# Supplementary material for: Defining the Molecular Character of the Developing and Adult Kidney Podocyte
Source: PLoS One. 2011 Sep 8;6(9):e24640. doi: 10.1371/journal.pone.0024640 (PMC3169617; doi:10.1371/journal.pone.0024640)
Supplement: Table S1 — Combined list of 894 genes showing elevated podocyte expression. (XLS) [file pone.0024640.s003.xls]

Transcripts Cluster Id	Fold change([PODADULT] vs [pod13.5]) ( UP - Fold change([PODADULT] vs [pod13.5]) )	Log Fold change([PODADULT] vs [pod13.5]) ( UP - Fold change([PODADULT] vs [pod13.5]) )	Absolute Fold change([PODADULT] vs [pod13.5]) ( UP - Fold change([PODADULT] vs [pod13.5]) )	Regulation([PODADULT] vs [pod13.5]) ( UP - Fold change([PODADULT] vs [pod13.5]) )	Fold change([PODADULT] vs [cortex-total]) ( UP - Fold change([PODADULT] vs [cortex-total]) )	Log Fold change([PODADULT] vs [cortex-total]) ( UP - Fold change([PODADULT] vs [cortex-total]) )	Absolute Fold change([PODADULT] vs [cortex-total]) ( UP - Fold change([PODADULT] vs [cortex-total]) )	genesymbol	genedescription
10344658	3.8443418	1.9427366	3.8443418	up				Rb1cc1	RB1-inducible coiled-coil 1
10344707	9.194623	3.2007904	9.194623	up				Pcmtd1	protein-L-isoaspartate (D-aspartate) O-methyltransferase domain containing 1
10344897	6.114023	2.612122	6.114023	up	16.611198	4.0540843	16.611198	Sulf1	sulfatase 1
10345141	4.3606977	2.124559	4.3606977	up				Lmbrd1	LMBR1 domain containing 1
10345241	6.3788166	2.6732888	6.3788166	up				Dst	dystonin
10345704					3.3171663	1.7299514	3.3171663		
10346348	3.3168166	1.7297993	3.3168166	up				Spats2l	"spermatogenesis associated, serine-rich 2-like"
10346551	5.7573557	2.5254064	5.7573557	up				Cflar	CASP8 and FADD-like apoptosis regulator
10346562	4.78304	2.257928	4.78304	up				Cflar	CASP8 and FADD-like apoptosis regulator
10346695	4.4081125	2.140161	4.4081125	up				Nbeal1	neurobeachin like 1
10346722	6.1120453	2.6116552	6.1120453	up				Nbeal1	neurobeachin like 1
10346810	10.658569	3.4139419	10.658569	up	10.224491	3.3539572	10.224491	Pard3b	par-3 partitioning defective 3 homolog B (C. elegans)
10346838	17.436	4.123997	17.436	up	19.83527	4.309996	19.83527	Pard3b	par-3 partitioning defective 3 homolog B (C. elegans)
10347220					3.383379	1.7584648	3.383379		
10347222					3.7230532	1.8964863	3.7230532		
10347224					3.3888283	1.7607865	3.3888283		
10347807	8.356711	3.0629354	8.356711	up	7.0035524	2.8080869	7.0035524	Col4a3	"collagen, type IV, alpha 3"
10347860					3.8495588	1.9446931	3.8495588		
10347933	6.126071	2.614962	6.126071	up				Sp140|Arhgef12|C130026I21Rik|A530032D15Rik|LOC100040994|LOC100041057	Sp140 nuclear body protein | Rho guanine nucleotide exchange factor (GEF) 12 | RIKEN cDNA C130026I21 gene | RIKEN cDNA A530032D15Rik gene | similar to RIKEN cDNA C130026I21 gene | similar to C130026I21Rik protein
10348493	3.6985128	1.8869452	3.6985128	up	4.929048	2.301309	4.929048	Lrrfip1	leucine rich repeat (in FLII) interacting protein 1
10348775	3.653999	1.8694763	3.653999	up				Ppp1r7	"protein phosphatase 1, regulatory (inhibitor) subunit 7"
10348817	4.0728164	2.0260267	4.0728164	up				2-Sep	septin 2
10349404	13.484549	3.7532353	13.484549	up	11.902849	3.573235	11.902849	Mgat5	mannoside acetylglucosaminyltransferase 5
10350473	21.455626	4.423284	21.455626	up	19.51903	4.2868094	19.51903	B3galt2	"UDP-Gal:betaGlcNAc beta 1,3-galactosyltransferase, polypeptide 2"
10350646	4.223791	2.0785384	4.223791	up				Edem3	"ER degradation enhancer, mannosidase alpha-like 3"
10350806	77.15423	6.2696733	77.15423	up	19.878252	4.313119	19.878252	Nphs2	"nephrosis 2 homolog, podocin (human)"
10350819	3.1971543	1.6767883	3.1971543	up				Csnk2a1	"casein kinase 2, alpha 1 polypeptide"
10350992	3.043955	1.605947	3.043955	up				Rc3h1	RING CCCH (C3H) domains 1
10351380	6.5062556	2.7018275	6.5062556	up	4.882053	2.287488	4.882053	Ildr2	immunoglobulin-like domain containing receptor 2
10351623	4.7251205	2.2403512	4.7251205	up				F11r	F11 receptor
10352194	4.92875	2.3012218	4.92875	up				Cdc42bpa	CDC42 binding protein kinase alpha
10352661	4.3648577	2.1259346	4.3648577	up	5.6703696	2.5034428	5.6703696	Ptpn14	"protein tyrosine phosphatase, non-receptor type 14"
10353181	8.402787	3.070868	8.402787	up				Lactb2	"lactamase, beta 2"
10353773					3.8049712	1.9278855	3.8049712	Gm15455	predicted gene 15455
10354003	15.739677	3.976334	15.739677	up	3.4124892	1.7708244	3.4124892	Mgat4a	"mannoside acetylglucosaminyltransferase 4, isoenzyme A"
10354368					5.061936	2.3396893	5.061936		
10354372	6.7383156	2.752388	6.7383156	up				Myl6	"myosin, light polypeptide 6, alkali, smooth muscle and non-muscle"
10354404	3.020792	1.5949268	3.020792	up				Dnajb6	"DnaJ (Hsp40) homolog, subfamily B, member 6"
10354494	3.5074937	1.8104405	3.5074937	up				Nab1	Ngfi-A binding protein 1
10354897	3.5714707	1.8365183	3.5714707	up				Trak2	"trafficking protein, kinesin binding 2"
10355567	5.6056724	2.4868875	5.6056724	up	3.456237	1.7892022	3.456237	Tmbim1	transmembrane BAX inhibitor motif containing 1
10355958	3.2069204	1.6811886	3.2069204	up				Ube2v1	ubiquitin-conjugating enzyme E2 variant 1
10356088	4.4036593	2.1387029	4.4036593	up	4.4400654	2.150581	4.4400654	Col4a4	"collagen, type IV, alpha 4"
10356267	16.281792	4.0251875	16.281792	up	6.9230947	2.7914171	6.9230947	A530032D15Rik	
10356269	24.771593	4.6306148	24.771593	up	5.516779	2.4638262	5.516779	Sp140|A530032D15Rik	Sp140 nuclear body protein | RIKEN cDNA A530032D15Rik gene
10356333					3.0777464	1.6218743	3.0777464	Snord82	"small nucleolar RNA, C/D box 82"
10356936	3.9853914	1.9947214	3.9853914	up				Ppip5k2	diphosphoinositol pentakisphosphate kinase 2
10356968	5.3874645	2.4296064	5.3874645	up				Pam	peptidylglycine alpha-amidating monooxygenase
10357164	7.068838	2.8214731	7.068838	up	3.165396	1.662386	3.165396	Epb4.1l5	erythrocyte protein band 4.1-like 5
10357488	9.597525	3.2626624	9.597525	up	6.59527	2.7214317	6.59527	Cd55	CD55 antigen
10357630	5.6779876	2.5053797	5.6779876	up	4.215348	2.0756516	4.215348	Srgap2	SLIT-ROBO Rho GTPase activating protein 2
10357875					3.339319	1.7395539	3.339319	Btg2	"B-cell translocation gene 2, anti-proliferative"
10358259	3.530405	1.8198338	3.530405	up				Nek7	NIMA (never in mitosis gene a)-related expressed kinase 7
10358459	4.8633084	2.281938	4.8633084	up				BC003331|Tpr	cDNA sequence BC003331 | translocated promoter region
10358717					5.0085144	2.3243828	5.0085144	1700025G04Rik	RIKEN cDNA 1700025G04 gene
10359118	44.59912	5.4789433	44.59912	up	51.01716	5.6729107	51.01716	Tdrd5	tudor domain containing 5
10359428	3.274501	1.7112751	3.274501	up				Aph1a	anterior pharynx defective 1a homolog (C. elegans)
10359713	3.8876736	1.9589071	3.8876736	up				Sft2d2	SFT2 domain containing 2
10359849	3.1413004	1.651362	3.1413004	up	4.301736	2.104919	4.301736	Uck2	uridine-cytidine kinase 2
10359961	3.1860769	1.6717811	3.1860769	up				Uhmk1	U2AF homology motif (UHM) kinase 1
10359982	4.128103	2.0454788	4.128103	up				Atf6	activating transcription factor 6
10360506					4.8210526	2.2693481	4.8210526	Akt3	thymoma viral proto-oncogene 3
10360684	22.231415	4.474528	22.231415	up	5.6793914	2.5057364	5.6793914	Ephx1	"epoxide hydrolase 1, microsomal"
10360789	9.874972	3.3037767	9.874972	up				Degs1	degenerative spermatocyte homolog 1 (Drosophila)
10360806	4.24422	2.0854993	4.24422	up				Capn2	calpain 2
10361356					3.167915	1.6635337	3.167915		
10361771					8.664469	3.1151114	8.664469	Plagl1	pleiomorphic adenoma gene-like 1
10361790	7.458543	2.8988938	7.458543	up				Fuca2	"fucosidase, alpha-L- 2, plasma"
10361897	9.707998	3.2791739	9.707998	up	5.271106	2.3981056	5.271106	Ifngr1	interferon gamma receptor 1
10361926	4.402894	2.138452	4.402894	up				Map3k5	mitogen-activated protein kinase kinase kinase 5
10362201	4.143793	2.050952	4.143793	up	4.50038	2.1700468	4.50038	Ctgf	connective tissue growth factor
10362294	5.799484	2.5359244	5.799484	up				Arhgap18	Rho GTPase activating protein 18
10362596	6.1541033	2.6215487	6.1541033	up	7.9434524	2.9897661	7.9434524	Fyn	
10362674					3.4800706	1.7991166	3.4800706	Rnu3a	U3A small nuclear RNA
10363000	3.3125176	1.7279282	3.3125176	up				Gpx4	glutathione peroxidase 4
10363350	3.938172	1.9775262	3.938172	up				P4ha1	"procollagen-proline, 2-oxoglutarate 4-dioxygenase (proline 4-hydroxylase), alpha 1 polypeptide"
10363379	5.117189	2.3553514	5.117189	up	4.0284367	2.01022	4.0284367	Cbara1	calcium binding atopy-related autoantigen 1
10363430	4.831065	2.2723413	4.831065	up				Psap	prosaposin
10364011	3.171586	1.6652045	3.171586	up				Cytsa	cytospin A
10364675	3.0468085	1.6072989	3.0468085	up				Gpx4	glutathione peroxidase 4
10365482	15.682614	3.9710941	15.682614	up				Timp3	tissue inhibitor of metalloproteinase 3
10366310	4.997107	2.321093	4.997107	up				Osbpl8	oxysterol binding protein-like 8
10366346					3.1201665	1.641623	3.1201665	Phlda1	"pleckstrin homology-like domain, family A, member 1"
10366446	3.619894	1.8559475	3.619894	up				Tspan8	tetraspanin 8
10367036	30.132063	4.9132276	30.132063	up	33.04206	5.0462317	33.04206	Rdh1	retinol dehydrogenase 1 (all trans)
10367041	10.53802	3.397532	10.53802	up	6.8934417	2.7852244	6.8934417	Rdh9	retinol dehydrogenase 9
10367475					3.022311	1.5956521	3.022311		
10367673	6.8831463	2.7830682	6.8831463	up	7.105605	2.8289576	7.105605	Plekhg1	"pleckstrin homology domain containing, family G (with RhoGef domain) member 1"
10367717	9.100678	3.1859741	9.100678	up				BC013529	
10367843	4.028736	2.0103273	4.028736	up				Utrn	utrophin
10367945	3.4039042	1.7671905	3.4039042	up				Phactr2	phosphatase and actin regulator 2
10368175	3.3958383	1.7637677	3.3958383	up				Pde7b	phosphodiesterase 7B
10368240	3.338819	1.7393379	3.338819	up	14.586838	3.8665953	14.586838	Tcf21	transcription factor 21
10368527	3.0944562	1.6296859	3.0944562	up				Hint3	histidine triad nucleotide binding protein 3
10368575	4.966988	2.3123713	4.966988	up				Gm3258|Supt4h1	predicted gene 3258 | suppressor of Ty 4 homolog 1 (S. cerevisiae)
10369102	9.584876	3.2607598	9.584876	up	7.824471	2.9679933	7.824471	Gm9766	predicted gene 9766
10369210	4.450804	2.154066	4.450804	up				Serinc1	serine incorporator 1
10369531	5.1627874	2.3681502	5.1627874	up	5.5265155	2.46637	5.5265155	Tspan15	tetraspanin 15
10369929	3.774435	1.9162607	3.774435	up	5.445547	2.445077	5.445547		
10371321	11.874812	3.5698328	11.874812	up	3.527432	1.8186183	3.527432	Slc41a2	"solute carrier family 41, member 2"
10372104					3.0749624	1.6205688	3.0749624	Gm8613	predicted gene 8613
10372478	3.4726355	1.796031	3.4726355	up				Rab21	"RAB21, member RAS oncogene family"
10372618	3.189207	1.6731977	3.189207	up				Frs2	fibroblast growth factor receptor substrate 2
10372891	10.035408	3.3270273	10.035408	up	25.021175	4.6450777	25.021175	Srgap1	SLIT-ROBO Rho GTPase activating protein 1
10373396	7.433345	2.8940115	7.433345	up				Myl6	"myosin, light polypeptide 6, alkali, smooth muscle and non-muscle"
10373521	3.3494565	1.743927	3.3494565	up				Rab5b	"RAB5B, member RAS oncogene family"
10373610					3.064349	1.6155806	3.064349	Olfr767	olfactory receptor 767
10374083	3.1088986	1.6364036	3.1088986	up	3.1615522	1.6606331	3.1615522	Aebp1	AE binding protein 1
10374119	3.7212179	1.8957748	3.7212179	up				Ogdh	oxoglutarate dehydrogenase (lipoamide)
10374202	3.6685994	1.8752294	3.6685994	up	4.4084153	2.1402602	4.4084153	Adcy1	adenylate cyclase 1
10374364	3.6549485	1.8698511	3.6549485	up				Akt2	thymoma viral proto-oncogene 2
10374455	4.8577967	2.280302	4.8577967	up	3.9978323	1.999218	3.9978323	Spred2	"sprouty-related, EVH1 domain containing 2"
10374466	3.837276	1.9400826	3.837276	up				Rab1	"RAB1, member RAS oncogene family"
10375002	7.312345	2.8703341	7.312345	up				Cpeb4	cytoplasmic polyadenylation element binding protein 4
10375123					3.135591	1.6487374	3.135591	C530030P08Rik	RIKEN cDNA C530030P08 gene
10375893	3.0860655	1.6257687	3.0860655	up				Sar1b	SAR1 gene homolog B (S. cerevisiae)
10375973	4.3128204	2.1086316	4.3128204	up				Taf13	"TAF13 RNA polymerase II, TATA box binding protein (TBP)-associated factor"
10376269	4.4467416	2.1527486	4.4467416	up	4.5432806	2.1837344	4.5432806	Galnt10	UDP-N-acetyl-alpha-D-galactosamine:polypeptide N-acetylgalactosaminyltransferase 10
10376534	4.2431817	2.0851464	4.2431817	up				Mprip	myosin phosphatase Rho interacting protein
10376956	13.003195	3.7007942	13.003195	up	10.973793	3.4559903	10.973793	Hs3st3a1	heparan sulfate (glucosamine) 3-O-sulfotransferase 3A1
10377431	5.2671037	2.3970098	5.2671037	up	5.213057	2.3821297	5.213057	Vamp2	vesicle-associated membrane protein 2
10377689	4.3975635	2.1367044	4.3975635	up				Gabarap	gamma-aminobutyric acid receptor associated protein
10378570	4.827167	2.2711768	4.827167	up					
10379650					3.376097	1.7553563	3.376097	Slfn3	schlafen 3
10379957	4.1177363	2.0418515	4.1177363	up				Rnft1	"ring finger protein, transmembrane 1"
10380059					3.2973485	1.7213063	3.2973485	Rnu3b1|Rnu3b2|Rnu3b4|Rnu3b3	U3B small nuclear RNA 1 | U3B small nuclear RNA 2 | U3B small nuclear RNA 4 | U3B small nuclear RNA 3
10380061					3.2940664	1.7198696	3.2940664	Rnu3b1|Rnu3b2|Rnu3b4|Rnu3b3	U3B small nuclear RNA 1 | U3B small nuclear RNA 2 | U3B small nuclear RNA 4 | U3B small nuclear RNA 3
10380063					3.291613	1.7187948	3.291613	Rnu3b1|Rnu3b2|Rnu3b4|Rnu3b3	U3B small nuclear RNA 1 | U3B small nuclear RNA 2 | U3B small nuclear RNA 4 | U3B small nuclear RNA 3
10380065					3.2923608	1.7191224	3.2923608	Rnu3b1|Rnu3b2|Rnu3b4|Rnu3b3	U3B small nuclear RNA 1 | U3B small nuclear RNA 2 | U3B small nuclear RNA 4 | U3B small nuclear RNA 3
10380129	4.3672533	2.1267262	4.3672533	up				Supt4h1|Gm3258	suppressor of Ty 4 homolog 1 (S. cerevisiae) | predicted gene 3258
10380226					3.2861714	1.7164078	3.2861714	Cuedc1	CUE domain containing 1
10380381	7.9177694	2.985094	7.9177694	up	3.0314178	1.5999928	3.0314178	Tob1	transducer of ErbB-2.1
10380384	4.424674	2.1455712	4.424674	up				Ankrd40	ankyrin repeat domain 40
10380534	4.3508143	2.1212854	4.3508143	up				Spop	speckle-type POZ protein
10381187	5.1494946	2.364431	5.1494946	up				Atp6v0a1	"ATPase, H+ transporting, lysosomal V0 subunit A1"
10381695	4.228579	2.080173	4.228579	up					
10383025	17.73336	4.148394	17.73336	up	18.22755	4.188049	18.22755	C1qtnf1	C1q and tumor necrosis factor related protein 1
10383756	6.7415366	2.7530775	6.7415366	up	4.736653	2.2438679	4.736653	Ifitm2	interferon induced transmembrane protein 2
10384044	3.1665983	1.6629338	3.1665983	up	4.3614497	2.1248078	4.3614497	Myl7	"myosin, light polypeptide 7, regulatory"
10384138	4.026421	2.0094981	4.026421	up				Tmed4	transmembrane emp24 protein transport domain containing 4
10384233	4.2088923	2.0734406	4.2088923	up				Tns3	tensin 3
10384522	3.9095302	1.9669952	3.9095302	up				Actr2	ARP2 actin-related protein 2 homolog (yeast)
10384555	3.112281	1.6379724	3.112281	up				Aftph	aftiphilin
10384572	3.0070589	1.5883532	3.0070589	up	5.4304996	2.4410849	5.4304996	1110067D22Rik	RIKEN cDNA 1110067D22 gene
10384795	5.937567	2.569872	5.937567	up				Cyb5d1|Gm6685	cytochrome b5 domain containing 1 | cytochrome b5 domain containing 1 pseudogene
10384885	4.895578	2.291479	4.895578	up				Spnb2	spectrin beta 2
10385572	4.702968	2.2335715	4.702968	up				Sqstm1	sequestosome 1
10385599	3.26105	1.7053366	3.26105	up				Canx	calnexin
10385926	7.718691	2.9483562	7.718691	up	5.6952	2.5097466	5.6952	Cdc42se2	CDC42 small effector 2
10386058	6.4261055	2.6839447	6.4261055	up	8.644823	3.1118364	8.644823	Sparc	secreted acidic cysteine rich glycoprotein
10387363	5.2527018	2.3930597	5.2527018	up				Cyb5d1|Gm6685	cytochrome b5 domain containing 1 | cytochrome b5 domain containing 1 pseudogene
10387625	5.1671133	2.3693585	5.1671133	up	6.06874	2.601397	6.06874	Chrnb1	"cholinergic receptor, nicotinic, beta polypeptide 1 (muscle)"
10388033	5.8921843	2.5588026	5.8921843	up				Derl2	"Der1-like domain family, member 2"
10388579	3.7276745	1.8982759	3.7276745	up				Gosr1	golgi SNAP receptor complex member 1
10388591	3.8404963	1.9412928	3.8404963	up				Cpd	carboxypeptidase D
10388884	6.5211473	2.7051258	6.5211473	up	4.62768	2.210289	4.62768	Nlk	nemo like kinase
10389022	20.003523	4.322182	20.003523	up	8.940825	3.160408	8.940825	Myo1d	myosin ID
10389025	46.14085	5.5279727	46.14085	up	11.010989	3.4608722	11.010989	Myo1d	myosin ID
10389526	3.1430504	1.6521654	3.1430504	up				Cltc	"clathrin, heavy polypeptide (Hc)"
10389674	3.169767	1.6643767	3.169767	up				Dynll2	dynein light chain LC8-type 2
10390103	3.7486486	1.9063706	3.7486486	up				Pdk2	"pyruvate dehydrogenase kinase, isoenzyme 2"
10390117	8.167339	3.0298662	8.167339	up	10.006076	3.3228045	10.006076	Itga3	integrin alpha 3
10390271	4.317026	2.1100378	4.317026	up	3.2171314	1.6857748	3.2171314	Nfe2l1	"nuclear factor, erythroid derived 2,-like 1"
10390574	4.4180603	2.143413	4.4180603	up				Fbxl20	F-box and leucine-rich repeat protein 20
10390635	5.0480337	2.3357215	5.0480337	up				1810046J19Rik	RIKEN cDNA 1810046J19 gene
10392087	4.087913	2.0313644	4.087913	up				Ccdc47	coiled-coil domain containing 47
10392560	12.548443	3.6494365	12.548443	up	14.55486	3.863429	14.55486	Abca9	"ATP-binding cassette, sub-family A (ABC1), member 9"
10392642	8.187484	3.03342	8.187484	up	5.5300164	2.4672837	5.5300164	Abca5	"ATP-binding cassette, sub-family A (ABC1), member 5"
10393559	5.8909597	2.5585027	5.8909597	up	6.023354	2.590567	6.023354	Timp2	tissue inhibitor of metalloproteinase 2
10393823	3.276009	1.7119393	3.276009	up				P4hb	"prolyl 4-hydroxylase, beta polypeptide"
10393836	4.390986	2.1345448	4.390986	up				Arhgdia	Rho GDP dissociation inhibitor (GDI) alpha
10394429	5.876996	2.555079	5.876996	up				1110057K04Rik	RIKEN cDNA 1110057K04 gene
10394735	4.211887	2.0744667	4.211887	up				Pdia6	protein disulfide isomerase associated 6
10394862					3.325217	1.7334485	3.325217	Asap2|Itgb1bp1	"ArfGAP with SH3 domain, ankyrin repeat and PH domain 2 | integrin beta 1 binding protein 1"
10395259	4.173812	2.0613656	4.173812	up				Nampt	nicotinamide phosphoribosyltransferase
10395273	4.325334	2.1128116	4.325334	up				Gdap10	ganglioside-induced differentiation-associated-protein 10
10395328	6.764656	2.7580166	6.764656	up				Snx13	sorting nexin 13
10395466	12.621135	3.6577697	12.621135	up	11.944272	3.578247	11.944272	Dock4	dedicator of cytokinesis 4
10395692	3.4208648	1.7743611	3.4208648	up				Arhgap5	Rho GTPase activating protein 5
10395770	3.109838	1.6368394	3.109838	up				Ppp2r3c|1700047I17Rik1|1700047I17Rik2|Srp54c	"protein phosphatase 2, regulatory subunit B'', gamma | RIKEN cDNA 1700047I17 gene 1 | RIKEN cDNA 1700047I17 gene 2 | signal recognition particle 54C"
10395780	3.0978024	1.6312451	3.0978024	up				Ppp2r3c|1700047I17Rik1|1700047I17Rik2|Srp54c	"protein phosphatase 2, regulatory subunit B'', gamma | RIKEN cDNA 1700047I17 gene 1 | RIKEN cDNA 1700047I17 gene 2 | signal recognition particle 54C"
10395805	4.0207176	2.007453	4.0207176	up				1700047I17Rik1|1700047I17Rik2	RIKEN cDNA 1700047I17 gene 1 | RIKEN cDNA 1700047I17 gene 2
10396066	3.2031238	1.6794796	3.2031238	up					
10396170					3.570195	1.8360028	3.570195	Frmd6	FERM domain containing 6
10396740	3.1679173	1.6635346	3.1679173	up				Gphn	gephyrin
10396778	10.952121	3.4531384	10.952121	up	3.1966152	1.6765451	3.1966152	Mpp5	"membrane protein, palmitoylated 5 (MAGUK p55 subfamily member 5)"
10397633					16.914944	4.0802264	16.914944	Flrt2	fibronectin leucine rich transmembrane protein 2
10397708					4.1297336	2.0460486	4.1297336		
10398240	3.5755515	1.8381658	3.5755515	up	4.878896	2.2865548	4.878896	Eml1	echinoderm microtubule associated protein like 1
10398350					3.7278223	1.8983331	3.7278223	Mir341	microRNA 341
10398727	3.5521863	1.8287072	3.5521863	up	3.406754	1.7683978	3.406754	Klc1	kinesin light chain 1
10399470	3.4682906	1.7942247	3.4682906	up	3.3223894	1.7322211	3.3223894	Trib2	tribbles homolog 2 (Drosophila)
10400023	3.5185256	1.814971	3.5185256	up	3.0397594	1.6039572	3.0397594	Tspan13	tetraspanin 13
10400137	3.3824677	1.7580762	3.3824677	up				Dnajb9	"DnaJ (Hsp40) homolog, subfamily B, member 9"
10400191	3.0556672	1.6114874	3.0556672	up				Strn3	"striatin, calmodulin binding protein 3"
10400704	3.2080443	1.681694	3.2080443	up					
10401630	3.5878904	1.8431358	3.5878904	up				Acyp1	"acylphosphatase 1, erythrocyte (common) type"
10401781	3.5374742	1.8227196	3.5374742	up				Sptlc2	"serine palmitoyltransferase, long chain base subunit 2"
10401900	4.488984	2.166389	4.488984	up				Sel1l	sel-1 suppressor of lin-12-like (C. elegans)
10401968	21.007385	4.3928246	21.007385	up				Galc	galactosylceramidase
10401997	3.254898	1.7026124	3.254898	up				Ptpn21	"protein tyrosine phosphatase, non-receptor type 21"
10402705					6.2022204	2.6327848	6.2022204	Gm266	predicted gene 266
10402715	3.0483396	1.6080236	3.0483396	up				Bag5	BCL2-associated athanogene 5
10403229	12.725939	3.6697001	12.725939	up				Itgb8	integrin beta 8
10403842	4.6370544	2.2132087	4.6370544	up	5.245982	2.391213	5.245982	Elmo1	"engulfment and cell motility 1, ced-12 homolog (C. elegans)"
10404036					3.2798195	1.7136164	3.2798195	Hist1h2bg	"histone cluster 1, H2bg"
10404053	13.9173565	3.7988133	13.9173565	up				Hist1h2bc	"histone cluster 1, H2bc"
10404059	7.456672	2.898532	7.456672	up				Hist1h1c	"histone cluster 1, H1c"
10404250	11.652123	3.542521	11.652123	up	4.51577	2.174972	4.51577	Dcdc2a	doublecortin domain containing 2a
10404422	17.580717	4.135922	17.580717	up	8.133731	3.0239172	8.133731	Serpinb6b	"serine (or cysteine) peptidase inhibitor, clade B, member 6b"
10404700	7.229198	2.8538356	7.229198	up				Ubxn2a	UBX domain protein 2A
10404774	4.3136086	2.1088953	4.3136086	up	6.325362	2.661148	6.325362	Hivep1	human immunodeficiency virus type I enhancer binding protein 1
10406067	4.1915045	2.0674682	4.1915045	up				Clptm1l	CLPTM1-like
10406205	3.8298256	1.9372787	3.8298256	up				Erap1	endoplasmic reticulum aminopeptidase 1
10406407	3.7129385	1.8925614	3.7129385	up				Arrdc3	arrestin domain containing 3
10406423	4.4444714	2.1520119	4.4444714	up				Mblac2	metallo-beta-lactamase domain containing 2
10406845					18.648058	4.2209535	18.648058	Foxd1	forkhead box D1
10407173	3.317628	1.7301521	3.317628	up	3.0649931	1.6158838	3.0649931	Il6st	interleukin 6 signal transducer
10407307	3.8743947	1.9539709	3.8743947	up				Mocs2	molybdenum cofactor synthesis 2
10407766	3.1608815	1.660327	3.1608815	up				Lgals8	"lectin, galactose binding, soluble 8"
10408249					4.778439	2.2565393	4.778439		
10408613	3.2039402	1.6798472	3.2039402	up	3.5935442	1.8454075	3.5935442	Tubb2b	"tubulin, beta 2B"
10408677	4.277701	2.0968356	4.277701	up				Lyrm4	LYR motif containing 4
10408850	5.405527	2.4344354	5.405527	up				Nedd9	"neural precursor cell expressed, developmentally down-regulated gene 9"
10409345	4.8827763	2.2877016	4.8827763	up				Cltb	"clathrin, light polypeptide (Lcb)"
10410039	3.7522833	1.9077687	3.7522833	up				Ptch1	patched homolog 1
10410124	4.2723727	2.0950375	4.2723727	up				Ctsl	cathepsin L
10410460					3.2043564	1.6800346	3.2043564	Ube2ql1	ubiquitin-conjugating enzyme E2Q family-like 1
10411156	4.266312	2.0929894	4.266312	up				Scamp1	secretory carrier membrane protein 1
10411229					3.5357463	1.8220148	3.5357463	F2r	coagulation factor II (thrombin) receptor
10411235	13.550739	3.7602997	13.550739	up	3.6691487	1.8754454	3.6691487	Iqgap2	IQ motif containing GTPase activating protein 2
10411709	3.0835898	1.6246109	3.0835898	up				Cdk7	cyclin-dependent kinase 7
10411804					3.161846	1.6607671	3.161846	Mast4	microtubule associated serine/threonine kinase family member 4
10412207					3.9281793	1.9738607	3.9281793	Gpx8	glutathione peroxidase 8 (putative)
10412267	3.7658794	1.9129868	3.7658794	up	5.6359916	2.4946694	5.6359916	Itga2	integrin alpha 2
10413733	5.151483	2.3649879	5.151483	up	6.3025026	2.6559248	6.3025026	Sema3g	"sema domain, immunoglobulin domain (Ig), short basic domain, secreted, (semaphorin) 3G"
10414706					3.8506265	1.9450932	3.8506265		
10414781					3.585338	1.8421092	3.585338	Gm13926|Gm10891	predicted gene 13926 | predicted gene 10891
10414793	3.2391608	1.6956201	3.2391608	up	4.65214	2.2178946	4.65214	C920008G01Rik|Gm10904|LOC634058	RIKEN cDNA C920008G01 gene | predicted gene 10904 | similar to T-cell receptor alpha chain V region CTL-L17 precursor
10414888					3.592802	1.8451095	3.592802	Gm13926|Gm10891	predicted gene 13926 | predicted gene 10891
10414903	3.2442126	1.6978683	3.2442126	up	4.6495624	2.217095	4.6495624	C920008G01Rik|Gm10893|Gm10904|LOC634058	RIKEN cDNA C920008G01 gene | predicted gene 10893 | predicted gene 10904 | similar to T-cell receptor alpha chain V region CTL-L17 precursor
10414932					3.1759646	1.6671948	3.1759646		
10415642	3.1604197	1.6601162	3.1604197	up				Sap18	Sin3-associated polypeptide 18
10415723	18.34382	4.197222	18.34382	up	27.113798	4.7609553	27.113798		
10415844	5.1658854	2.3690157	5.1658854	up				Ctsb|Fdft1	cathepsin B | farnesyl diphosphate farnesyl transferase 1
10416419	5.802319	2.5366297	5.802319	up	10.308767	3.3658	10.308767	Gm10847	predicted gene 10847
10416588	3.2655509	1.7073264	3.2655509	up				1300010F03Rik	RIKEN cDNA 1300010F03 gene
10416732					3.3430295	1.7411561	3.3430295	Snora30	"small nucleolar RNA, H/ACA box 30"
10416850	3.951598	1.9824362	3.951598	up				Scel	sciellin
10417757	3.8350153	1.9392323	3.8350153	up				Vps4b	vacuolar protein sorting 4b (yeast)
10418927	4.66453	2.2217317	4.66453	up				Bmpr1a	"bone morphogenetic protein receptor, type 1A"
10418991	7.822633	2.9676542	7.822633	up				Gcap14	granule cell antiserum positive 14
10419038	5.928682	2.5677114	5.928682	up				Ghitm	growth hormone inducible transmembrane protein
10419223	6.3494754	2.6666374	6.3494754	up				Fermt2	fermitin family homolog 2 (Drosophila)
10419274	3.7283707	1.8985453	3.7283707	up				Gmfb	"glia maturation factor, beta"
10419465	3.8463984	1.9435081	3.8463984	up	4.626114	2.2098007	4.626114	Ccnb1ip1	cyclin B1 interacting protein 1
10419726					3.4431012	1.7837086	3.4431012		
10420011	7.6560473	2.9365997	7.6560473	up				Myl6|Gm8894	"myosin, light polypeptide 6, alkali, smooth muscle and non-muscle | predicted gene 8894"
10420413	4.7773743	2.256218	4.7773743	up	3.968885	1.9887338	3.968885	Lats2	large tumor suppressor 2
10420457	3.6903365	1.8837523	3.6903365	up				Efha1	EF hand domain family A1
10420591	4.9358854	2.303309	4.9358854	up	3.1033046	1.6338053	3.1033046		
10420785	3.7915585	1.922791	3.7915585	up	3.0184135	1.5937905	3.0184135	Mtmr9	myotubularin related protein 9
10420988	4.5578637	2.1883578	4.5578637	up	7.661082	2.9375482	7.661082	Dpysl2	dihydropyrimidinase-like 2
10421046	10.768264	3.4287138	10.768264	up	6.0199647	2.589755	6.0199647	Dock5	dedicator of cytokinesis 5
10421526	3.3310823	1.735991	3.3310823	up				Rb1	retinoblastoma 1
10421557	5.1403375	2.3618631	5.1403375	up				Itm2b	integral membrane protein 2B
10421581	4.711279	2.2361188	4.711279	up	5.226664	2.3858905	5.226664	Lrch1	leucine-rich repeats and calponin homology (CH) domain containing 1
10421768	3.096964	1.6308546	3.096964	up				Akap11	A kinase (PRKA) anchor protein 11
10421950	4.6097593	2.2046914	4.6097593	up	10.350861	3.3716788	10.350861	Dach1	dachshund 1 (Drosophila)
10421970	5.166529	2.3691955	5.166529	up	8.148808	3.026589	8.148808		
10422598	6.6520233	2.7337933	6.6520233	up				Sepp1	"selenoprotein P, plasma, 1"
10422728	3.3860438	1.7596006	3.3860438	up				Dab2	disabled homolog 2 (Drosophila)
10423293	3.5686364	1.8353729	3.5686364	up				Myo10	myosin X
10423520	5.991997	2.583037	5.991997	up	5.9996147	2.5848699	5.9996147	Sema5a	"sema domain, seven thrombospondin repeats (type 1 and type 1-like), transmembrane domain (TM) and short cytoplasmic domain, (semaphorin) 5A"
10423548	4.1313868	2.046626	4.1313868	up				Sdc2	syndecan 2
10423556	12.257023	3.6155367	12.257023	up	3.2194693	1.6868229	3.2194693	Pgcp	plasma glutamate carboxypeptidase
10423568	4.533572	2.1806483	4.533572	up	4.140488	2.0498009	4.140488	5730407I07Rik	RIKEN cDNA 5730407I07 gene
10423941	5.7723074	2.529148	5.7723074	up				Ttc35	tetratricopeptide repeat domain 35
10424711					3.3193796	1.7309136	3.3193796	Rhpn1	"rhophilin, Rho GTPase binding protein 1"
10425114	7.1350913	2.8349319	7.1350913	up				Tmed2	transmembrane emp24 domain trafficking protein 2
10426437	8.399591	3.0703192	8.399591	up				Rn7sk	"RNA, 7SK, nuclear"
10426751	5.16943	2.3700051	5.16943	up				Tmbim6	transmembrane BAX inhibitor motif containing 6
10427052	3.6519623	1.8686719	3.6519623	up				Krt7	keratin 7
10427095	3.9549625	1.983664	3.9549625	up	4.172979	2.0610776	4.172979	Tenc1	tensin like C1 domain-containing phosphatase
10427290	5.2019143	2.3790426	5.2019143	up	7.6655803	2.938395	7.6655803	Hoxc8	homeobox C8
10427293	4.9617634	2.310853	4.9617634	up	6.382539	2.6741304	6.382539	Hoxc6	homeobox C6
10427303					3.1562452	1.6582093	3.1562452	Hoxc4	homeobox C4
10427428	4.480994	2.1638188	4.480994	up				AW549877	
10427461					4.1159253	2.0412169	4.1159253	Ptger4	prostaglandin E receptor 4 (subtype EP4)
10427796	17.070183	4.0934067	17.070183	up	34.198383	5.095856	34.198383	Npr3	natriuretic peptide receptor 3
10428020	4.6440163	2.215373	4.6440163	up				6-Mar	membrane-associated ring finger (C3HC4) 6
10428561	6.1896915	2.6298676	6.1896915	up				Rad21	RAD21 homolog (S. pombe)
10428594	3.8294423	1.9371343	3.8294423	up	3.463611	1.7922769	3.463611	Samd12	sterile alpha motif domain containing 12
10428857	9.27604	3.213509	9.27604	up	5.022514	2.3284097	5.022514	Mtss1	metastasis suppressor 1
10429160	5.3515778	2.4199643	5.3515778	up	9.83934	3.2985616	9.83934	St3gal1	"ST3 beta-galactoside alpha-2,3-sialyltransferase 1"
10429327					3.583528	1.8413806	3.583528	Eif2c2	"eukaryotic translation initiation factor 2C, 2"
10429607	16.99308	4.0868754	16.99308	up	6.6570864	2.734891	6.6570864	Top1mt	"DNA topoisomerase 1, mitochondrial"
10430201	3.6019716	1.8487868	3.6019716	up	4.089979	2.0320935	4.089979	Myh9	"myosin, heavy polypeptide 9, non-muscle"
10430956	3.2759483	1.7119126	3.2759483	up				Cyb5r3	cytochrome b5 reductase 3
10431915					6.8990283	2.7863932	6.8990283	Slc38a4	"solute carrier family 38, member 4"
10431935					3.225952	1.6897249	3.225952	Amigo2|Fam113b	"adhesion molecule with Ig like domain 2 | family with sequence similarity 113, member B"
10431962					3.2608032	1.7052274	3.2608032	Endou	"endonuclease, polyU-specific"
10432256	3.509667	1.8113341	3.509667	up				Arf3	ADP-ribosylation factor 3
10432278	3.3127859	1.728045	3.3127859	up	4.2532535	2.0885668	4.2532535	Ddn	dendrin
10432281	3.2656405	1.707366	3.2656405	up				Prkag1	"protein kinase, AMP-activated, gamma 1 non-catalytic subunit"
10432294					4.046936	2.01683	4.046936	Mll2	myeloid/lymphoid or mixed-lineage leukemia 2
10433445	4.0345473	2.0124068	4.0345473	up				Abat	4-aminobutyrate aminotransferase
10433721	3.3140016	1.7285743	3.3140016	up	3.5435534	1.8251967	3.5435534	Nde1	nuclear distribution gene E homolog 1 (A nidulans)
10434229	3.3530276	1.7454643	3.3530276	up	5.3747673	2.4262023	5.3747673	Cldn5	claudin 5
10434384	3.6664732	1.874393	3.6664732	up				Ap2m1	"adaptor protein complex AP-2, mu1"
10434733	3.9757056	1.9912109	3.9757056	up				Eif4a2	eukaryotic translation initiation factor 4A2
10434741					3.0533915	1.6104126	3.0533915		
10434758	4.8146305	2.267425	4.8146305	up	5.9499907	2.5728874	5.9499907	St6gal1	"beta galactoside alpha 2,6 sialyltransferase 1"
10435305	9.522916	3.2514033	9.522916	up	6.7878704	2.762959	6.7878704	Itgb5	integrin beta 5
10435345					3.0601091	1.6135831	3.0601091	Mylk	"myosin, light polypeptide kinase"
10435769	12.020029	3.5873685	12.020029	up				Zbtb20	zinc finger and BTB domain containing 20
10435789	9.034595	3.1754599	9.034595	up				Zbtb20	zinc finger and BTB domain containing 20
10436196	3.5370905	1.8225632	3.5370905	up				Cd47	"CD47 antigen (Rh-related antigen, integrin-associated signal transducer)"
10436209	4.2973943	2.1034622	4.2973943	up	9.309165	3.2186518	9.309165	Cblb	Casitas B-lineage lymphoma b
10436456	12.8738	3.686366	12.8738	up	9.859113	3.301458	9.859113	Pros1	protein S (alpha)
10436779	3.2172365	1.685822	3.2172365	up				Gm2805	predicted gene 2805
10436890					4.82807	2.2714467	4.82807	Gm10785	predicted gene 10785
10436945	4.8491006	2.277717	4.8491006	up				Slc5a3	"solute carrier family 5 (inositol transporters), member 3"
10437712	3.0636885	1.6152697	3.0636885	up				Zc3h7a	zinc finger CCCH type containing 7 A
10438753	21.604815	4.433281	21.604815	up	3.1446028	1.6528778	3.1446028	Leprel1	leprecan-like 1
10438769	3.4647708	1.7927599	3.4647708	up				Cldn1	claudin 1
10439126	10.630184	3.4100947	10.630184	up	5.134225	2.3601465	5.134225		
10439566	3.4464645	1.7851171	3.4464645	up				Atp6v1a	"ATPase, H+ transporting, lysosomal V1 subunit A"
10439642	3.7978785	1.9251938	3.7978785	up				Slc35a5	"solute carrier family 35, member A5"
10439881	4.789569	2.2598958	4.789569	up	5.3873453	2.4295745	5.3873453	5330426P16Rik	RIKEN cDNA 5330426P16 gene
10439895					3.068624	1.6175919	3.068624	Alcam	activated leukocyte cell adhesion molecule
10440099	11.655409	3.5429277	11.655409	up	7.0867906	2.8251324	7.0867906	St3gal6|Dcbld2	"ST3 beta-galactoside alpha-2,3-sialyltransferase 6 | discoidin, CUB and LCCL domain containing 2"
10440344	6.9746284	2.8021164	6.9746284	up	15.381154	3.9430919	15.381154	Robo2	roundabout homolog 2 (Drosophila)
10440491	9.328261	3.2216082	9.328261	up				App	amyloid beta (A4) precursor protein
10440570	3.2639616	1.706624	3.2639616	up				Rnf160	ring finger protein 160
10440717					4.043632	2.0156517	4.043632	Krtap6-1|Krtap16-8|Gm10229	keratin associated protein 6-1 | keratin associated protein 16-8 | predicted gene 10229
10442616	3.3438518	1.7415109	3.3438518	up				Hagh	hydroxyacyl glutathione hydrolase
10442904	3.8348405	1.9391665	3.8348405	up				Jmjd8|Stub1	jumonji domain containing 8 | STIP1 homology and U-Box containing protein 1
10443021	4.6719713	2.2240314	4.6719713	up				Atp6v0e	"ATPase, H+ transporting, lysosomal V0 subunit E"
10443027	5.7252254	2.5173326	5.7252254	up				A930001N09Rik	RIKEN cDNA A930001N09 gene
10444589	3.3790731	1.7566276	3.3790731	up				Hspa1a|Hspa1b	heat shock protein 1A | heat shock protein 1B
10444780	4.4245877	2.145543	4.4245877	up				H2-D1|H2-L	"histocompatibility 2, D region locus 1"
10444830	11.800306	3.5607524	11.800306	up	4.1640387	2.0579834	4.1640387	H2-Q7|H2-Q6|H2-Q8	"histocompatibility 2, Q region locus 7 | histocompatibility 2, Q region locus 6 | histocompatibility 2, Q region locus 8"
10444890	4.3182635	2.1104512	4.3182635	up				Ier3	immediate early response 3
10445185	6.462481	2.6920881	6.462481	up	7.5751786	2.92128	7.5751786	Rn18s	18S ribosomal RNA
10445237	3.4880636	1.8024263	3.4880636	up	4.9901037	2.3190699	4.9901037	3110082D06Rik	RIKEN cDNA 3110082D06 gene
10445241	3.451519	1.7872314	3.451519	up				Tnfrsf21	"tumor necrosis factor receptor superfamily, member 21"
10445338	6.159276	2.6227608	6.159276	up				Enpp5	ectonucleotide pyrophosphatase/phosphodiesterase 5
10445347	33.9388	5.0848637	33.9388	up	9.105511	3.18674	9.105511	Clic5	chloride intracellular channel 5
10445909	3.0821795	1.623951	3.0821795	up				Kat2b	K(lysine) acetyltransferase 2B
10446334	17.909515	4.1626544	17.909515	up	20.417418	4.3517284	20.417418	Glcci1	glucocorticoid induced transcript 1
10446656	10.206498	3.351416	10.206498	up	4.445456	2.1523314	4.445456	Lpin2	lipin 2
10446986	10.172007	3.3465323	10.172007	up	4.698124	2.2320848	4.698124	Crim1	cysteine rich transmembrane BMP regulator 1 (chordin like)
10447141					3.188091	1.6726928	3.188091	Eml4	echinoderm microtubule associated protein like 4
10447190	6.3074374	2.657054	6.3074374	up	16.725359	4.0639653	16.725359	Plekhh2	"pleckstrin homology domain containing, family H (with MyTH4 domain) member 2"
10447354	5.89817	2.5602674	5.89817	up				Tmx2	thioredoxin-related transmembrane protein 2
10447490	3.46267	1.7918849	3.46267	up				Pja2	"praja 2, RING-H2 motif containing"
10447566	3.2976754	1.7214494	3.2976754	up				Atp5g2	"ATP synthase, H+ transporting, mitochondrial F0 complex, subunit C2 (subunit 9)"
10447602	5.1505876	2.364737	5.1505876	up				Ezr	ezrin
10447617					3.1908813	1.673955	3.1908813	Mir692-1	microRNA 692-1
10447708	6.4030895	2.6787682	6.4030895	up	5.9517336	2.57331	5.9517336	Qk	quaking
10448094	6.58029	2.718151	6.58029	up				Lnpep	leucyl/cystinyl aminopeptidase
10449581	3.8349304	1.9392004	3.8349304	up				Mtch1	mitochondrial carrier homolog 1 (C. elegans)
10450075	3.2702894	1.7094183	3.2702894	up				H2-K1	"histocompatibility 2, K1, K region"
10450699	4.0855937	2.0305457	4.0855937	up				H2-t9|EG547347	"MHC class Ib T9 | predicted gene, EG547347"
10450814	3.6962788	1.8860736	3.6962788	up				Ppp1r11	"protein phosphatase 1, regulatory (inhibitor) subunit 11"
10450920	3.3556595	1.7465963	3.3556595	up	13.1487875	3.716858	13.1487875	AY036118	
10451004	7.3609033	2.8798828	7.3609033	up	3.522144	1.8164539	3.522144	Cd2ap	CD2-associated protein
10451054	4.916871	2.2977405	4.916871	up				Enpp4	ectonucleotide pyrophosphatase/phosphodiesterase 4
10451198	9.398344	3.2324066	9.398344	up	6.1970344	2.631578	6.1970344	Vegfa	vascular endothelial growth factor A
10451679	8.466253	3.0817237	8.466253	up	10.366185	3.3738132	10.366185	Daam2	dishevelled associated activator of morphogenesis 2
10452613	12.079159	3.594448	12.079159	up	25.891197	4.69439	25.891197	Arhgap28	Rho GTPase activating protein 28
10452643	3.538136	1.8229895	3.538136	up				2900073G15Rik	RIKEN cDNA 2900073G15 gene
10452874	3.3805544	1.7572598	3.3805544	up				Atp6v1f	"ATPase, H+ transporting, lysosomal V1 subunit F"
10453678					3.2977397	1.7214775	3.2977397	Zeb1	zinc finger E-box binding homeobox 1
10453705	4.386979	2.1332278	4.386979	up				Rab18	"RAB18, member RAS oncogene family"
10453747	9.327851	3.2215447	9.327851	up	11.6076	3.5369978	11.6076	Colec12	collectin sub-family member 12
10453759	9.857083	3.3011608	9.857083	up	11.685843	3.54669	11.685843	Gm10554	predicted gene 10554
10454786	4.478844	2.1631265	4.478844	up				Ctnna1	"catenin (cadherin associated protein), alpha 1"
10454828					7.429417	2.893249	7.429417	Pnet-ps	"prenatal ethanol induced mRNA, pseudogene"
10455238	5.1824055	2.373622	5.1824055	up				Ndfip1	Nedd4 family interacting protein 1
10455372	6.1436715	2.619101	6.1436715	up				C330007P06Rik	RIKEN cDNA C330007P06 gene
10455721					7.299986	2.8678937	7.299986	Sncaip	"synuclein, alpha interacting protein (synphilin)"
10456120	4.771886	2.2545595	4.771886	up	4.009997	2.003601	4.009997	Csnk1a1	"casein kinase 1, alpha 1"
10456296	6.820344	2.7698445	6.820344	up	3.3359842	1.7381124	3.3359842	Malt1	mucosa associated lymphoid tissue lymphoma translocation gene 1
10456723	4.42034	2.1441574	4.42034	up				BC031181	
10456974	6.829787	2.7718406	6.829787	up				Arf1	ADP-ribosylation factor 1
10457183	3.309633	1.7266712	3.309633	up				Tmx3	thioredoxin-related transmembrane protein 3
10457223					3.5854957	1.8421726	3.5854957	2610005L07Rik|6820431F20Rik	cadherin 11 pseudogene
10457250	5.238594	2.3891797	5.238594	up				Arhgap12	Rho GTPase activating protein 12
10457273	4.8695188	2.2837791	4.8695188	up				Kif5b	kinesin family member 5B
10458046					3.7073896	1.8904037	3.7073896	D0H4S114	"DNA segment, human D4S114"
10458731	6.6423216	2.7316875	6.6423216	up	6.6455274	2.7323837	6.6455274	Mcc	mutated in colorectal cancers
10458762					3.4003768	1.7656946	3.4003768	Gm10540	predicted gene 10540
10459084	5.3993955	2.432798	5.3993955	up	7.4272566	2.8928294	7.4272566	Synpo	synaptopodin
10459421	30.169254	4.915007	30.169254	up	13.759433	3.782349	13.759433	Atp8b1	"ATPase, class I, type 8B, member 1"
10460376	3.0378191	1.6030359	3.0378191	up				Ppp1ca	"protein phosphatase 1, catalytic subunit, alpha isoform"
10461078	3.0184057	1.5937867	3.0184057	up				Atl3	atlastin GTPase 3
10461108	3.226885	1.6901422	3.226885	up				Iscu	IscU iron-sulfur cluster scaffold homolog (E. coli)
10461277	4.861494	2.2813997	4.861494	up				Ganab	alpha glucosidase 2 alpha neutral subunit
10462111	6.4688983	2.69352	6.4688983	up	5.5916443	2.4832726	5.5916443	Gm9938	predicted gene 9938
10462195	7.4606657	2.8993044	7.4606657	up	4.346882	2.1199808	4.346882	Kank1	KN motif and ankyrin repeat domains 1
10462237	3.1124046	1.6380296	3.1124046	up				Smarca2	"SWI/SNF related, matrix associated, actin dependent regulator of chromatin, subfamily a, member 2"
10462752	3.2598205	1.7047925	3.2598205	up				Btaf1	"BTAF1 RNA polymerase II, B-TFIID transcription factor-associated, (Mot1 homolog, S. cerevisiae)"
10462922	18.732578	4.2274776	18.732578	up	33.284893	5.0567956	33.284893	Plce1	"phospholipase C, epsilon 1"
10463224	9.32802	3.221571	9.32802	up	11.263916	3.4936366	11.263916	Marveld1	MARVEL (membrane-associating) domain containing 1
10463355	7.6763535	2.940421	7.6763535	up	8.676804	3.1171637	8.676804	Scd2	stearoyl-Coenzyme A desaturase 2
10463486	3.3710413	1.7531943	3.3710413	up				Btrc	beta-transducin repeat containing protein
10463704	4.3380218	2.1170373	4.3380218	up				As3mt	arsenic (+3 oxidation state) methyltransferase
10463799	3.3709912	1.7531729	3.3709912	up	5.0965877	2.3495317	5.0965877		
10464425	4.1995597	2.070238	4.1995597	up	4.691909	2.230175	4.691909	Grk5	G protein-coupled receptor kinase 5
10465244	5.840273	2.5460358	5.840273	up	3.6865706	1.8822794	3.6865706	Malat1	metastasis associated lung adenocarcinoma transcript 1 (non-coding RNA)
10465474	3.638085	1.8631792	3.638085	up				Prdx5|Trmt112	peroxiredoxin 5 | tRNA methyltransferase 11-2 homolog (S. cerevisiae)
10465553	4.1911874	2.067359	4.1911874	up				Fkbp2	FK506 binding protein 2
10465649	3.0921772	1.628623	3.0921772	up				Mark2	MAP/microtubule affinity-regulating kinase 2
10465683	3.7659502	1.9130139	3.7659502	up				Rab11b	"RAB11B, member RAS oncogene family"
10465853	5.7236476	2.5169349	5.7236476	up				Stxbp3a|Stxbp3b	syntaxin binding protein 3A | syntaxin-binding protein 3B
10466441	5.8972754	2.5600486	5.8972754	up				Vps13a	vacuolar protein sorting 13A (yeast)
10466573	3.099528	1.6320486	3.099528	up				Ostf1	osteoclast stimulating factor 1
10466606	18.340826	4.1969867	18.340826	up	10.613355	3.4078088	10.613355	Anxa1	annexin A1
10467013	6.1424813	2.6188216	6.1424813	up	7.0553236	2.8187122	7.0553236	Prkg1	"protein kinase, cGMP-dependent, type I"
10467068	3.758718	1.9102407	3.758718	up				Sgms1	sphingomyelin synthase 1
10467110	5.248969	2.392034	5.248969	up				AI747699	
10467139	3.7237597	1.89676	3.7237597	up				Lipa	lysosomal acid lipase A
10467162	3.6441588	1.8655858	3.6441588	up				Pank1	pantothenate kinase 1
10467191	3.229625	1.6913667	3.229625	up	3.0949318	1.6299076	3.0949318	Ankrd1	ankyrin repeat domain 1 (cardiac muscle)
10467258	14.164613	3.8242192	14.164613	up	6.5422845	2.7097945	6.5422845	Myof	myoferlin
10467560	3.7583787	1.9101105	3.7583787	up				Tm9sf3	transmembrane 9 superfamily member 3
10468309					5.916019	2.5646267	5.916019	Sh3pxd2a	SH3 and PX domains 2A
10468448					3.2479527	1.6995306	3.2479527		
10468746					4.4077773	2.1400514	4.4077773	Hspa12a	heat shock protein 12A
10469195					4.12987	2.0460963	4.12987	Mir669b	microRNA 669b
10469243					6.2655716	2.6474462	6.2655716	Mir297b	microRNA 297b
10469322					8.299351	3.0529985	8.299351	Vim	vimentin
10469457	7.3451257	2.8767872	7.3451257	up				Plxdc2	plexin domain containing 2
10469720	4.5734477	2.1932821	4.5734477	up				Acbd5	acyl-Coenzyme A binding domain containing 5
10470101	25.129797	4.651327	25.129797	up	18.321692	4.195481	18.321692	Clic3	chloride intracellular channel 3
10470834	3.427122	1.7769976	3.427122	up				Spna2	spectrin alpha 2
10471247	10.825679	3.4363856	10.825679	up	4.325267	2.1127892	4.325267	Aif1l	allograft inflammatory factor 1-like
10471464	6.216445	2.6360898	6.216445	up	8.027687	3.0049844	8.027687	St6galnac6	"ST6 (alpha-N-acetyl-neuraminyl-2,3-beta-galactosyl-1,3)-N-acetylgalactosaminide alpha-2,6-sialyltransferase 6"
10471533					5.5979238	2.484892	5.5979238		
10471555	18.978706	4.2463098	18.978706	up	13.119329	3.713622	13.119329	Angptl2	angiopoietin-like 2
10471567	13.770174	3.783475	13.770174	up	33.664272	5.0731463	33.664272	C130021I20Rik	Riken cDNA C130021I20 gene
10472097	4.1221147	2.0433846	4.1221147	up	6.065291	2.6005769	6.065291	Fmnl2	formin-like 2
10472501	5.558177	2.4746118	5.558177	up				Lass6	"LAG1 homolog, ceramide synthase 6"
10472893	4.853423	2.2790027	4.853423	up	3.3653526	1.7507577	3.3653526	B230120H23Rik	RIKEN cDNA B230120H23 gene
10473107					4.2668576	2.093174	4.2668576		
10473160	3.3632276	1.7498465	3.3632276	up				Ssfa2	sperm specific antigen 2
10473281	8.316598	3.0559936	8.316598	up	3.160447	1.6601286	3.160447	Itgav	integrin alpha V
10473965	3.0030472	1.5864272	3.0030472	up				Arhgap1	Rho GTPase activating protein 1
10474045	3.2821205	1.7146282	3.2821205	up	5.9660063	2.5767655	5.9660063	Chst1	carbohydrate (keratan sulfate Gal-6) sulfotransferase 1
10474223	9.229071	3.2061853	9.229071	up	5.4815636	2.4545875	5.4815636	Cd59b	CD59b antigen
10474229	41.55886	5.3770843	41.55886	up	11.035495	3.4640794	11.035495	Cd59a|Cd59b	CD59a antigen | CD59b antigen
10474295	3.1629403	1.6612663	3.1629403	up	19.176609	4.261276	19.176609	Wt1	Wilms tumor 1 homolog
10474411	3.4783516	1.7984037	3.4783516	up				Lin7c	lin-7 homolog C (C. elegans)
10474588	3.855769	1.9470186	3.855769	up				2900064A13Rik	RIKEN cDNA 2900064A13 gene
10475890	34.855984	5.1233344	34.855984	up	8.682702	3.118144	8.682702	Mertk	c-mer proto-oncogene tyrosine kinase
10475912	4.1829405	2.0645175	4.1829405	up				Tmem87b	transmembrane protein 87B
10476021	5.9092064	2.5629644	5.9092064	up	3.1439376	1.6525726	3.1439376	Sirpa	signal-regulatory protein alpha
10476326	3.9707875	1.9894252	3.9707875	up				Cds2	CDP-diacylglycerol synthase (phosphatidate cytidylyltransferase) 2
10478383					3.8640563	1.9501162	3.8640563	R3hdml	R3H domain containing-like
10478744					6.2055855	2.6335673	6.2055855		
10478907	3.1788442	1.6685023	3.1788442	up				Pard6b	par-6 (partitioning defective 6) homolog beta (C. elegans)
10479077	4.093195	2.0332274	4.093195	up				Vapb	"vesicle-associated membrane protein, associated protein B and C"
10479087	3.7113829	1.8919568	3.7113829	up	3.0935102	1.6292448	3.0935102	Stx16	syntaxin 16
10479185					3.6029122	1.8491635	3.6029122		
10479833	9.421341	3.2359324	9.421341	up	7.347005	2.8771563	7.347005	Optn	optineurin
10480121	3.6681302	1.8750448	3.6681302	up				Fam188a	"family with sequence similarity 188, member A"
10480275	9.41579	3.2350821	9.41579	up	9.89708	3.307003	9.89708	Nebl	nebulette
10480286	5.2372456	2.3888083	5.2372456	up	7.090429	2.825873	7.090429	Nebl	nebulette
10480288	5.069735	2.3419104	5.069735	up	6.984904	2.8042402	6.984904	Nebl	nebulette
10480423	3.125881	1.6442628	3.125881	up				Abi1	abl-interactor 1
10480804	4.1980624	2.0697236	4.1980624	up				Phpt1	phosphohistidine phosphatase 1
10481349					3.1492813	1.6550226	3.1492813	Ntng2|6530402F18Rik	netrin G2 | RIKEN cDNA 6530402F18 gene
10481540	3.2672644	1.7080832	3.2672644	up				Fnbp1	formin binding protein 1
10481711					3.7497602	1.9067984	3.7497602	Stxbp1	syntaxin binding protein 1
10482144	4.257978	2.0901685	4.257978	up				Rc3h2	ring finger and CCCH-type zinc finger domains 2
10482500					3.0305815	1.5995946	3.0305815	Rnd3	Rho family GTPase 3
10483025	3.3780122	1.7561746	3.3780122	up				Rbms1	"RNA binding motif, single stranded interacting protein 1"
10483046	32.822277	5.0366035	32.822277	up	9.869693	3.3030052	9.869693	Dpp4	dipeptidylpeptidase 4
10484237	4.0840597	2.030004	4.0840597	up	4.018896	2.0067992	4.018896	Zfp385b	zinc finger protein 385B
10484402	3.0884328	1.6268749	3.0884328	up				Ctnnd1	"catenin (cadherin associated protein), delta 1"
10484431	4.9112673	2.2960954	4.9112673	up				Tmx2	thioredoxin-related transmembrane protein 2
10484888	7.561173	2.91861	7.561173	up				Ptprj	"protein tyrosine phosphatase, receptor type, J"
10484894	8.309899	3.054831	8.309899	up				Ptprj	"protein tyrosine phosphatase, receptor type, J"
10485213	4.624128	2.2091813	4.624128	up	3.086347	1.6259003	3.086347	Cd82	CD82 antigen
10485357					5.840176	2.546012	5.840176		
10485562	4.5595727	2.1888986	4.5595727	up				Hipk3	homeodomain interacting protein kinase 3
10485633					3.1854482	1.6714964	3.1854482	Gm10796	predicted gene 10796
10485643	10.118609	3.3389392	10.118609	up	23.468393	4.552647	23.468393	AI314831	
10485828	8.48633	3.0851407	8.48633	up				Slc12a6|Gm10792	"solute carrier family 12, member 6 | predicted gene 10792"
10486057	3.875811	1.9544983	3.875811	up				Rab5b	"RAB5B, member RAS oncogene family"
10486396	5.901189	2.5610056	5.901189	up	4.4759746	2.162202	4.4759746	Ehd4	EH-domain containing 4
10487267	4.4735017	2.1614046	4.4735017	up				Polr2l	polymerase (RNA) II (DNA directed) polypeptide L
10487321	3.2065263	1.6810112	3.2065263	up				2010106G01Rik	RIKEN cDNA 2010106G01 gene
10487476	6.7637863	2.757831	6.7637863	up				1500011K16Rik	RIKEN cDNA 1500011K16 gene
10488415	5.064292	2.3403606	5.064292	up				Cst3	cystatin C
10488687	4.0274606	2.0098705	4.0274606	up				Pdrg1	p53 and DNA damage regulated 1
10489065	4.100961	2.035962	4.100961	up				Ndrg3	N-myc downstream regulated gene 3
10489241					4.808651	2.2656322	4.808651	Gm826	predicted gene 826
10489246					8.5434265	3.0948148	8.5434265	Mafb	"v-maf musculoaponeurotic fibrosarcoma oncogene family, protein B (avian)"
10489377	4.6540565	2.2184887	4.6540565	up				Serinc3	serine incorporator 3
10489484	5.0789075	2.3445182	5.0789075	up	4.432177	2.1480155	4.432177	Sdc4	syndecan 4
10490248					3.60432	1.8497272	3.60432		
10490903	10.732998	3.4239812	10.732998	up	12.069278	3.5932674	12.069278	Car13	carbonic anhydrase 13
10491279	5.5558276	2.474002	5.5558276	up	3.8453507	1.9431152	3.8453507	Prkci	"protein kinase C, iota"
10491414	5.614918	2.489265	5.614918	up	8.217601	3.0387173	8.217601	Usp13	ubiquitin specific peptidase 13 (isopeptidase T-3)
10491627	4.0630283	2.0225554	4.0630283	up				4932438A13Rik	RIKEN cDNA 4932438A13 gene
10492180	4.414674	2.1423068	4.414674	up				Rnf13	ring finger protein 13
10492220	4.25986	2.090806	4.25986	up				2810407C02Rik	RIKEN cDNA 2810407C02 gene
10492341					3.401431	1.7661419	3.401431	4631416L12Rik	RIKEN cDNA 4631416L12 gene
10492355	9.036022	3.1756878	9.036022	up				Mme	membrane metallo endopeptidase
10492499	3.5770054	1.8387523	3.5770054	up				Mfsd1	major facilitator superfamily domain containing 1
10492522					4.4241304	2.1453938	4.4241304	Schip1	schwannomin interacting protein 1
10492699	3.5424807	1.82476	3.5424807	up				Ctso	cathepsin O
10492890	3.2316027	1.6922498	3.2316027	up				Lrba	LPS-responsive beige-like anchor
10493114	7.65814	2.936994	7.65814	up	12.102653	3.5972514	12.102653	Nes	nestin
10493995	3.9018571	1.9641609	3.9018571	up				S100a10	S100 calcium binding protein A10 (calpactin)
10494227	3.2478743	1.6994958	3.2478743	up				Lass2	"LAG1 homolog, ceramide synthase 2"
10494312	3.2176342	1.6860003	3.2176342	up				Aph1a|Car14	anterior pharynx defective 1a homolog (C. elegans) | carbonic anhydrase 14
10494335	4.4028373	2.1384335	4.4028373	up				Otud7b	OTU domain containing 7B
10494413					3.0235858	1.5962605	3.0235858	Rnu1b1|Rnu1b2|Rnu1b6	U1b1 small nuclear RNA | U1b2 small nuclear RNA | U1b6 small nuclear RNA
10494421					3.0104768	1.589992	3.0104768	Rnu1b1|Rnu1b2|Rnu1b6	U1b1 small nuclear RNA | U1b2 small nuclear RNA | U1b6 small nuclear RNA
10494428	3.2676876	1.7082701	3.2676876	up				Txnip	thioredoxin interacting protein
10494662	3.4785883	1.798502	3.4785883	up				Ywhah	"tyrosine 3-monooxygenase/tryptophan 5-monooxygenase activation protein, eta polypeptide"
10494761	5.564548	2.4762645	5.564548	up	5.5126305	2.462741	5.5126305	Vtcn1	V-set domain containing T cell activation inhibitor 1
10494821	18.54983	4.213334	18.54983	up	25.460518	4.67019	25.460518	Tspan2	tetraspanin 2
10495359	3.9614437	1.9860263	3.9614437	up				Clcc1	chloride channel CLIC-like 1
10495685	3.0905445	1.627861	3.0905445	up				Arhgap29	Rho GTPase activating protein 29
10495896	3.0595822	1.6133347	3.0595822	up				Camk2d	"calcium/calmodulin-dependent protein kinase II, delta"
10496397	4.5906987	2.1987138	4.5906987	up				Mapksp1	MAPK scaffold protein 1
10496494	8.344647	3.060851	8.344647	up	4.4084463	2.1402702	4.4084463	Tspan5	tetraspanin 5
10496519					4.8206415	2.2692251	4.8206415	Unc5c	unc-5 homolog C (C. elegans)
10497149	5.81377	2.539474	5.81377	up				Wls	wntless homolog (Drosophila)
10497548	3.7092612	1.8911319	3.7092612	up	4.617367	2.2070704	4.617367	Fndc3b	fibronectin type III domain containing 3B
10497817	3.5180254	1.8147659	3.5180254	up				Anxa5	annexin A5
10497931	4.8480363	2.2774005	4.8480363	up				Cflar	CASP8 and FADD-like apoptosis regulator
10498064	5.579602	2.4801621	5.579602	up	6.1776924	2.627068	6.1776924	Setd7	SET domain containing (lysine methyltransferase) 7
10498273	10.604518	3.4066072	10.604518	up	6.006994	2.5866432	6.006994	Tm4sf1	transmembrane 4 superfamily member 1
10498584	9.7045555	3.2786622	9.7045555	up	9.993144	3.3209386	9.993144	Rarres1	retinoic acid receptor responder (tazarotene induced) 1
10498775	6.1822333	2.628128	6.1822333	up	12.781365	3.67597	12.781365	Golim4	golgi integral membrane protein 4
10499168	3.211869	1.683413	3.211869	up	4.5296226	2.179391	4.5296226	Kirrel	kin of IRRE like (Drosophila)
10499420	3.9972193	1.9989967	3.9972193	up				Robld3	roadblock domain containing 3
10499811	6.3541255	2.6676936	6.3541255	up	7.240595	2.8561082	7.240595	Npr1	natriuretic peptide receptor 1
10500295					3.470468	1.7951303	3.470468	Plekho1	"pleckstrin homology domain containing, family O member 1"
10500327	13.762762	3.7826982	13.762762	up	3.890697	1.9600286	3.890697	Hist2h3c2	"histone cluster 2, H3c2"
10500343					3.0301256	1.5993776	3.0301256	Rnu1b1|Rnu1b2|Rnu1b6	U1b1 small nuclear RNA | U1b2 small nuclear RNA | U1b6 small nuclear RNA
10500358					3.0343108	1.6013689	3.0343108	Rnu1b1|Rnu1b2|Rnu1b6	U1b1 small nuclear RNA | U1b2 small nuclear RNA | U1b6 small nuclear RNA
10500614	12.372949	3.6291175	12.372949	up	4.8626285	2.2817364	4.8626285	Man1a2	"mannosidase, alpha, class 1A, member 2"
10500685	6.882036	2.7828355	6.882036	up				Atp1a1	"ATPase, Na+/K+ transporting, alpha 1 polypeptide"
10501397	3.5632324	1.8331866	3.5632324	up				Tmem167b	transmembrane protein 167B
10501629	20.262024	4.3407063	20.262024	up	14.309856	3.8389373	14.309856	Cdc14a	CDC14 cell division cycle 14 homolog A (S. cerevisiae)
10501860	5.017979	2.3271065	5.017979	up	5.6794667	2.5057554	5.6794667	Fnbp1l	formin binding protein 1-like
10502081	25.585968	4.677281	25.585968	up	8.316997	3.0560627	8.316997	Enpep	glutamyl aminopeptidase
10502105	7.5452557	2.9155698	7.5452557	up				Egf	epidermal growth factor
10502240	14.027634	3.8101997	14.027634	up	5.9593945	2.5751657	5.9593945	Npnt	nephronectin
10502469	3.3975973	1.7645149	3.3975973	up				Pdlim5	PDZ and LIM domain 5
10502655					3.5095046	1.8112674	3.5095046	Cyr61	cysteine rich protein 61
10502823	4.881348	2.2872796	4.881348	up				Dnajb4	"DnaJ (Hsp40) homolog, subfamily B, member 4"
10502890	4.936411	2.3034625	4.936411	up	10.195315	3.3498344	10.195315	St6galnac3	"ST6 (alpha-N-acetyl-neuraminyl-2,3-beta-galactosyl-1,3)-N-acetylgalactosaminide alpha-2,6-sialyltransferase 3"
10502951	4.087717	2.0312953	4.087717	up				Acadm	"acyl-Coenzyme A dehydrogenase, medium chain"
10503259	4.9872994	2.3182588	4.9872994	up	3.1322691	1.6472082	3.1322691	Trp53inp1	transformation related protein 53 inducible nuclear protein 1
10503399	7.1733384	2.8426447	7.1733384	up				Myl6|Gm8894	"myosin, light polypeptide 6, alkali, smooth muscle and non-muscle | predicted gene 8894"
10504008	3.3507652	1.7444906	3.3507652	up				Chmp5	chromatin modifying protein 5
10505073					3.6726248	1.8768115	3.6726248	Zfp462	zinc finger protein 462
10505270	3.80845	1.929204	3.80845	up				Slc31a2	"solute carrier family 31, member 2"
10505587	3.4233532	1.7754102	3.4233532	up				Kdm4c	lysine (K)-specific demethylase 4C
10506254	5.264223	2.3962207	5.264223	up	12.233771	3.6127973	12.233771	Raver2	"ribonucleoprotein, PTB-binding 2"
10506298	3.7006917	1.887795	3.7006917	up				Leprot	leptin receptor overlapping transcript
10506335	3.4342554	1.7799973	3.4342554	up	3.1419816	1.6516747	3.1419816	Pde4b	"phosphodiesterase 4B, cAMP specific"
10506360	9.327274	3.2214556	9.327274	up	12.893068	3.6885238	12.893068	Sgip1	SH3-domain GRB2-like (endophilin) interacting protein 1
10506643	4.0031266	2.0011272	4.0031266	up				Tmem59	transmembrane protein 59
10506870	3.0741372	1.6201816	3.0741372	up				Txndc12	thioredoxin domain containing 12 (endoplasmic reticulum)
10506883	18.309687	4.1945353	18.309687	up	14.007146	3.8080912	14.007146	Rab3b	"RAB3B, member RAS oncogene family"
10506893	3.8957026	1.9618835	3.8957026	up				Nrd1|Osbpl9	"nardilysin, N-arginine dibasic convertase, NRD convertase 1 | oxysterol binding protein-like 9"
10506939	4.0668316	2.0239053	4.0668316	up				Eps15	epidermal growth factor receptor pathway substrate 15
10507299	3.1053638	1.6347623	3.1053638	up				Gpbp1l1	GC-rich promoter binding protein 1-like 1
10507784	5.554695	2.4737077	5.554695	up				Ppt1	palmitoyl-protein thioesterase 1
10508135	3.3775098	1.75596	3.3775098	up				Trappc3	trafficking protein particle complex 3
10508405	28.227964	4.819053	28.227964	up	34.909504	5.125548	34.909504	Tmem54	transmembrane protein 54
10508436	4.3838134	2.1321864	4.3838134	up	5.1354556	2.3604922	5.1354556	Sync|Rbbp4	syncoilin | retinoblastoma binding protein 4
10508454	3.6493175	1.8676267	3.6493175	up				Bsdc1	BSD domain containing 1
10508805	4.056149	2.0201106	4.056149	up	3.6457875	1.8662305	3.6457875	Wasf2	"WAS protein family, member 2"
10509023	5.3356557	2.4156656	5.3356557	up				Syf2	"SYF2 homolog, RNA splicing factor (S. cerevisiae)"
10509246					3.6531456	1.8691392	3.6531456	Luzp1	leucine zipper protein 1
10511631					5.4259224	2.4398685	5.4259224	Slc26a7	"solute carrier family 26, member 7"
10511725	3.4500923	1.7866349	3.4500923	up				Cyb5r4	cytochrome b5 reductase 4
10511739	7.52089	2.9109035	7.52089	up				Cpne3	copine III
10512125	3.2503474	1.700594	3.2503474	up				Psenen	presenilin enhancer 2 homolog (C. elegans)
10512937					3.0464451	1.6071267	3.0464451	Rnu1b1|Rnu1b2|Rnu1b6	U1b1 small nuclear RNA | U1b2 small nuclear RNA | U1b6 small nuclear RNA
10513061	8.34545	3.0609899	8.34545	up	5.97697	2.5794144	5.97697	Ctnnal1	"catenin (cadherin associated protein), alpha-like 1"
10513082	3.229941	1.6915078	3.229941	up				D730040F13Rik	RIKEN cDNA D730040F13 gene
10513158	3.37554	1.7551184	3.37554	up				Ptpn3	"protein tyrosine phosphatase, non-receptor type 3"
10513381	4.0416894	2.0149584	4.0416894	up				Rod1	ROD1 regulator of differentiation 1 (S. pombe)
10513536					3.804545	1.9277239	3.804545	Gm2173	predicted gene 2173
10514298	3.9273808	1.9735675	3.9273808	up				Mrpl48	mitochondrial ribosomal protein L48
10514466					4.0405207	2.0145411	4.0405207	Jun	
10514668	3.550368	1.8279686	3.550368	up				Jak1	Janus kinase 1
10514779	6.9227104	2.791337	6.9227104	up				Prkaa2	"protein kinase, AMP-activated, alpha 2 catalytic subunit"
10514892	4.086974	2.031033	4.086974	up				2210012G02Rik	RIKEN cDNA 2210012G02 gene
10515051	9.776341	3.2892947	9.776341	up				Osbpl9|Nrd1	"oxysterol binding protein-like 9 | nardilysin, N-arginine dibasic convertase, NRD convertase 1"
10515574	4.0958543	2.0341644	4.0958543	up				St3gal3	"ST3 beta-galactoside alpha-2,3-sialyltransferase 3"
10516007	4.4087987	2.1403856	4.4087987	up				Zmpste24	"zinc metallopeptidase, STE24 homolog (S. cerevisiae)"
10516051	4.7012677	2.2330499	4.7012677	up				Cap1	"CAP, adenylate cyclase-associated protein 1 (yeast)"
10516103	3.9984112	1.9994268	3.9984112	up	3.1018279	1.6331186	3.1018279	Macf1	microtubule-actin crosslinking factor 1
10516211	3.9960332	1.9985685	3.9960332	up				Ndufs5	NADH dehydrogenase (ubiquinone) Fe-S protein 5
10516590					3.3022454	1.7234473	3.3022454	Zbtb8a	zinc finger and BTB domain containing 8a
10516910	6.7113876	2.746611	6.7113876	up	3.1436656	1.6524477	3.1436656	Phactr4	phosphatase and actin regulator 4
10517328	4.4114285	2.1412458	4.4114285	up				Tmem50a	transmembrane protein 50A
10517463	3.0955374	1.6301899	3.0955374	up	3.567896	1.8350735	3.567896	Luzp1	leucine zipper protein 1
10518147	24.062937	4.588741	24.062937	up	17.479622	4.127602	17.479622	Pdpn	podoplanin
10518346					3.5924494	1.8449678	3.5924494	Gm13251|1700029I01Rik|Gm13051|Gm13139|Gm13151	predicted gene 13251 | RIKEN cDNA 1700029I01 gene | predicted gene 13051 | predicted gene 13139 | predicted gene 13151
10518774	4.9286656	2.301197	4.9286656	up				Park7	"Parkinson disease (autosomal recessive, early onset) 7"
10518805	3.1545672	1.6574421	3.1545672	up				Vamp3	vesicle-associated membrane protein 3
10519012	3.5479996	1.8270059	3.5479996	up				Arhgef16	Rho guanine nucleotide exchange factor (GEF) 16
10519140	4.1687727	2.0596228	4.1687727	up	5.045895	2.3351102	5.045895	Mmp23	matrix metallopeptidase 23
10519747	24.704996	4.626731	24.704996	up	23.71994	4.5680285	23.71994	Sema3e	"sema domain, immunoglobulin domain (Ig), short basic domain, secreted, (semaphorin) 3E"
10519913	17.204964	4.104753	17.204964	up	16.2476	4.022155	16.2476	Magi2	"membrane associated guanylate kinase, WW and PDZ domain containing 2"
10520250	3.6181297	1.8552442	3.6181297	up				Nub1	negative regulator of ubiquitin-like proteins 1
10520288	3.0169904	1.5931101	3.0169904	up				Galnt11	UDP-N-acetyl-alpha-D-galactosamine:polypeptide N-acetylgalactosaminyltransferase 11
10521616	5.803767	2.5369897	5.803767	up	4.3711033	2.1279974	4.3711033	C1qtnf7	C1q and tumor necrosis factor related protein 7
10521622					3.7833478	1.9196634	3.7833478		
10522060	3.2791896	1.7133393	3.2791896	up	5.6303573	2.4932265	5.6303573	Fam114a1	"family with sequence similarity 114, member A1"
10522248	11.271297	3.4945817	11.271297	up				Gm6517	predicted gene 6517
10522265	3.9336114	1.9758544	3.9336114	up				Slc30a9	"solute carrier family 30 (zinc transporter), member 9"
10522288					4.7061696	2.2345533	4.7061696	Shisa3	shisa homolog 3 (Xenopus laevis)
10522324	5.96274	2.5759754	5.96274	up	6.6523137	2.7338562	6.6523137	Gabrb1	"gamma-aminobutyric acid (GABA) A receptor, subunit beta 1"
10522378	3.0088227	1.5891991	3.0088227	up	3.2727635	1.7105093	3.2727635	Slain2	"SLAIN motif family, member 2"
10523206	3.1727426	1.6657305	3.1727426	up				Uso1	"USO1 homolog, vesicle docking protein (yeast)"
10523260	3.2884662	1.7174149	3.2884662	up	3.9284065	1.9739442	3.9284065	Shroom3	shroom family member 3
10523281	10.439321	3.383956	10.439321	up	10.664887	3.4147968	10.664887	11-Sep	septin 11
10523451	4.117803	2.041875	4.117803	up	4.734879	2.2433276	4.734879	Anxa3	annexin A3
10523579	7.4903946	2.9050417	7.4903946	up	3.0526469	1.6100607	3.0526469	Arhgap24	Rho GTPase activating protein 24
10524314	3.6944273	1.8853507	3.6944273	up				Pitpnb	"phosphatidylinositol transfer protein, beta"
10524882	3.5236542	1.8170724	3.5236542	up				Wsb2	WD repeat and SOCS box-containing 2
10525439	6.1486545	2.6202707	6.1486545	up				P2rx4	"purinergic receptor P2X, ligand-gated ion channel 4"
10525744	3.6347027	1.8618374	3.6347027	up				Tmed2	transmembrane emp24 domain trafficking protein 2
10525829					3.8447282	1.9428816	3.8447282		
10527538	5.179599	2.3728404	5.179599	up	9.242505	3.208284	9.242505	Rasl11a	"RAS-like, family 11, member A"
10527598	3.4350512	1.7803316	3.4350512	up				Pomp	proteasome maturation protein
10528268					3.1740642	1.6663313	3.1740642	Ptpn12	"protein tyrosine phosphatase, non-receptor type 12"
10528929	3.0153236	1.5923128	3.0153236	up				Hadha	"hydroxyacyl-Coenzyme A dehydrogenase/3-ketoacyl-Coenzyme A thiolase/enoyl-Coenzyme A hydratase (trifunctional protein), alpha subunit"
10529082	3.2006803	1.6783786	3.2006803	up				Mpv17	MpV17 mitochondrial inner membrane protein
10529819	21.713226	4.440502	21.713226	up	11.114337	3.47435	11.114337	Fgfbp1	fibroblast growth factor binding protein 1
10530421	4.5055504	2.1717033	4.5055504	up	6.9274597	2.7923265	6.9274597	Gabra4	"gamma-aminobutyric acid (GABA) A receptor, subunit alpha 4"
10530560	4.3315387	2.1148796	4.3315387	up	4.2020645	2.0710983	4.2020645	Slain2	"SLAIN motif family, member 2"
10530563	6.113506	2.612	6.113506	up	5.3450885	2.4182138	5.3450885	Fryl	furry homolog-like (Drosophila)
10530592	14.906819	3.8979006	14.906819	up	9.5581665	3.256734	9.5581665	Fryl	furry homolog-like (Drosophila)
10530612	26.13903	4.7081337	26.13903	up	21.14397	4.4021745	21.14397	Fryl	furry homolog-like (Drosophila)
10530733	4.071111	2.0254226	4.071111	up				Clock	circadian locomoter output cycles kaput
10530841	9.306273	3.2182035	9.306273	up				Igfbp7	insulin-like growth factor binding protein 7
10531529	3.023516	1.5962272	3.023516	up				Cnot6l	"CCR4-NOT transcription complex, subunit 6-like"
10531653	5.980911	2.5803652	5.980911	up	7.9793997	2.9962802	7.9793997	Tmem150c	transmembrane protein 150C
10532267					4.469649	2.1601615	4.469649	Vmn2r9	"vomeronasal 2, receptor 9"
10533050	3.2245202	1.6890845	3.2245202	up	4.6563983	2.2192144	4.6563983	Hspb8	heat shock protein 8
10533145	3.3773613	1.7558966	3.3773613	up				Tpcn1	two pore channel 1
10533945	6.0209875	2.5900002	6.0209875	up				Ubc	ubiquitin C
10534056					3.499948	1.8073335	3.499948	Hpvc-ps	"human papillomavirus 18 E5 central sequence motif, pseudogene"
10534142	3.0472598	1.6075125	3.0472598	up				Sbds	Shwachman-Bodian-Diamond syndrome homolog (human)
10534316	3.1125054	1.6380763	3.1125054	up	3.2560022	1.7031016	3.2560022	Eif4h	eukaryotic translation initiation factor 4H
10534862	3.9447079	1.9799185	3.9447079	up	3.4198327	1.7739258	3.4198327	Pcolce	procollagen C-endopeptidase enhancer protein
10535866	5.235162	2.3882341	5.235162	up				Ubl3	ubiquitin-like 3
10536170					5.131531	2.3593893	5.131531	Rn18s	18S ribosomal RNA
10536697	19.625723	4.294674	19.625723	up	12.889873	3.6881661	12.889873	Asb15	ankyrin repeat and SOCS box-containing 15
10536895	4.096836	2.0345101	4.096836	up				Atp6v1f	"ATPase, H+ transporting, lysosomal V1 subunit F"
10536931	4.3502436	2.1210961	4.3502436	up				Ahcyl2	S-adenosylhomocysteine hydrolase-like 2
10537227	3.0029154	1.5863638	3.0029154	up				Tmem140|3110062M04Rik	transmembrane protein 140 | RIKEN cDNA 3110062M04 gene
10537880					4.066829	2.0239043	4.066829		
10538377	4.511626	2.1736474	4.511626	up	5.7105546	2.5136309	5.7105546	Wipf3	"WAS/WASL interacting protein family, member 3"
10539769	3.3645642	1.7504196	3.3645642	up				Nfu1	NFU1 iron-sulfur cluster scaffold homolog (S. cerevisiae)
10539894	7.6508794	2.9356256	7.6508794	up				Mgll	monoglyceride lipase
10540122	4.9685526	2.3128257	4.9685526	up				Slc6a6	"solute carrier family 6 (neurotransmitter transporter, taurine), member 6"
10541484	3.9598558	1.9854479	3.9598558	up				M6pr|M6pr-ps	"mannose-6-phosphate receptor, cation dependent | mannose-6-phosphate receptor, pseudogene"
10542414	33.633877	5.071843	33.633877	up	26.760542	4.7420354	26.760542	Ptpro	"protein tyrosine phosphatase, receptor type, O"
10542522					3.1248612	1.6437922	3.1248612	Plekha5	"pleckstrin homology domain containing, family A member 5"
10543118	10.063278	3.3310285	10.063278	up	9.583967	3.260623	9.583967	Glcci1	glucocorticoid induced transcript 1
10543145	15.915411	3.9923525	15.915411	up	13.931353	3.8002634	13.931353	Thsd7a	"thrombospondin, type I, domain containing 7A"
10543273					3.1948462	1.6757464	3.1948462	Cttnbp2	cortactin binding protein 2
10543306	5.203584	2.3795056	5.203584	up				Tspan12	tetraspanin 12
10543448	3.416834	1.7726603	3.416834	up				Wasl	Wiskott-Aldrich syndrome-like (human)
10543686	5.221971	2.3845944	5.221971	up				Ube2h|Gm2058	ubiquitin-conjugating enzyme E2H | predicted gene 2058
10543791	27.613659	4.78731	27.613659	up	26.537691	4.729971	26.537691	Podxl	podocalyxin-like
10544002	3.6486843	1.8673763	3.6486843	up	3.0527155	1.6100931	3.0527155	Creb3l2	cAMP responsive element binding protein 3-like 2
10544133	4.2086124	2.0733447	4.2086124	up				Parp12	"poly (ADP-ribose) polymerase family, member 12"
10544148	3.7521021	1.9076991	3.7521021	up				Jhdm1d	jumonji C domain-containing histone demethylase 1 homolog D (S. cerevisiae)
10544525	4.9159493	2.29747	4.9159493	up				Pdia4|Mir704	protein disulfide isomerase associated 4 | microRNA 704
10544570	9.125446	3.1898952	9.125446	up	3.4125004	1.7708292	3.4125004	Pcnp	PEST proteolytic signal containing nuclear protein
10544638					5.3486037	2.4191623	5.3486037	Tra2a	transformer 2 alpha homolog (Drosophila)
10544732	3.1145017	1.6390014	3.1145017	up				Skap2	src family associated phosphoprotein 2
10544885					3.4720101	1.7957711	3.4720101	Fkbp14	FK506 binding protein 14
10544891	5.8772955	2.5551524	5.8772955	up	5.1620846	2.3679538	5.1620846	Nod1	nucleotide-binding oligomerization domain containing 1
10545130	5.149156	2.364336	5.149156	up	7.260699	2.8601084	7.260699	Gadd45a	growth arrest and DNA-damage-inducible 45 alpha
10545283	4.636984	2.2131867	4.636984	up	6.3154726	2.6588907	6.3154726	Smyd1	SET and MYND domain containing 1
10545298	5.621369	2.4909215	5.621369	up				Rmnd5a	required for meiotic nuclear division 5 homolog A (S. cerevisiae)
10545409	16.213135	4.019091	16.213135	up				Vamp8	vesicle-associated membrane protein 8
10545450	3.5853891	1.8421297	3.5853891	up				Tgoln1|Tgoln2	trans-golgi network protein | trans-golgi network protein 2
10545479					5.595567	2.4842844	5.595567	Tmsb10	"thymosin, beta 10"
10545910	3.8617582	1.9492579	3.8617582	up				Pcyox1	prenylcysteine oxidase 1
10545958	9.6462965	3.2699752	9.6462965	up				Anxa4	annexin A4
10546803	4.5788836	2.1949959	4.5788836	up				Itpr1|Gm10429	"inositol 1,4,5-triphosphate receptor 1 | predicted gene 10429"
10546944	3.111668	1.6376882	3.111668	up				Tmem111	transmembrane protein 111
10547009	3.3751776	1.7549634	3.3751776	up				Vgll4	vestigial like 4 (Drosophila)
10547521	6.9539833	2.7978396	6.9539833	up				Atp6v1e1	"ATPase, H+ transporting, lysosomal V1 subunit E1"
10547916	4.45222	2.1545248	4.45222	up	3.4358778	1.7806787	3.4358778	Ptms	parathymosin
10548116					3.1628504	1.6612253	3.1628504	Ccnd2|Gm7308	cyclin D2 | calmodulin 2 pseudogene
10548692	3.2322264	1.6925282	3.2322264	up				Kap	kidney androgen regulated protein
10548727					3.118189	1.6407084	3.118189	D230041D01Rik	RIKEN cDNA D230041D01 gene
10549420	8.616642	3.1071258	8.616642	up	9.447468	3.2399278	9.447468	Tmtc1	transmembrane and tetratricopeptide repeat containing 1
10551009					5.826414	2.5426083	5.826414	Tmsb10	"thymosin, beta 10"
10551393	3.2416477	1.6967273	3.2416477	up				Akt2	thymoma viral proto-oncogene 2
10551907	19.261686	4.267662	19.261686	up	22.874743	4.5156837	22.874743	Nphs1	"nephrosis 1 homolog, nephrin (human)"
10552249					3.711244	1.8919029	3.711244	Gm6795	predicted gene 6795
10552276	6.154555	2.6216545	6.154555	up				Ube2h|Gm2058	ubiquitin-conjugating enzyme E2H | predicted gene 2058
10552824	3.0904188	1.6278024	3.0904188	up				Rras	"Harvey rat sarcoma oncogene, subgroup R"
10553299	5.6152096	2.4893398	5.6152096	up	4.9702	2.313304	4.9702	Ifitm2	interferon induced transmembrane protein 2
10555011	3.7837343	1.9198108	3.7837343	up				Nars2	asparaginyl-tRNA synthetase 2 (mitochondrial)(putative)
10555118	25.870583	4.6932406	25.870583	up	9.773237	3.2888365	9.773237	Pak1	p21 protein (Cdc42/Rac)-activated kinase 1
10555414	3.4488642	1.7861214	3.4488642	up				Rab6	"RAB6, member RAS oncogene family"
10555438	3.149861	1.6552882	3.149861	up	3.2868288	1.7166963	3.2868288	Fchsd2	FCH and double SH3 domains 2
10556082	4.320423	2.1111727	4.320423	up				Ppfibp2	"PTPRF interacting protein, binding protein 2 (liprin beta 2)"
10556133	3.5213816	1.8161416	3.5213816	up				Styx	serine/threonine/tyrosine interaction protein
10556297	28.685379	4.8422437	28.685379	up	18.628523	4.2194414	18.628523	Adm	adrenomedullin
10556426	15.293658	3.9348617	15.293658	up	6.102134	2.609314	6.102134	Parva	"parvin, alpha"
10556528	5.7221704	2.5165625	5.7221704	up				Pde3b	"phosphodiesterase 3B, cGMP-inhibited"
10557703					3.3511562	1.744659	3.3511562	Snora30	"small nucleolar RNA, H/ACA box 30"
10558150	28.206383	4.81795	28.206383	up	4.2504654	2.0876207	4.2504654	Htra1	HtrA serine peptidase 1
10558227	3.8623774	1.9494891	3.8623774	up				Acadsb	"acyl-Coenzyme A dehydrogenase, short/branched chain"
10558436	4.561324	2.1894526	4.561324	up				BC005624	
10558769	3.392605	1.7623935	3.392605	up	3.1094174	1.6366444	3.1094174	Ifitm1	interferon induced transmembrane protein 1
10558948	5.0952067	2.3491406	5.0952067	up				Cd151	CD151 antigen
10559261	11.065199	3.4679575	11.065199	up				Cd81	CD81 antigen
10560174	4.059353	2.0212498	4.059353	up				Sepw1	"selenoprotein W, muscle 1"
10560592	3.188464	1.6728616	3.188464	up				Clptm1	cleft lip and palate associated transmembrane protein 1
10560816	3.8979502	1.9627156	3.8979502	up				Atp5g2	"ATP synthase, H+ transporting, mitochondrial F0 complex, subunit C2 (subunit 9)"
10561527	11.444027	3.516523	11.444027	up	3.4818091	1.7998371	3.4818091	Actn4|Capn12	actinin alpha 4 | calpain 12
10561842	6.502519	2.7009988	6.502519	up				Capns1	"calpain, small subunit 1"
10561927	3.2324123	1.6926112	3.2324123	up	4.0752416	2.0268855	4.0752416	Aplp1	amyloid beta (A4) precursor-like protein 1
10562000	3.312415	1.7278833	3.312415	up				Psenen	presenilin enhancer 2 homolog (C. elegans)
10564343	5.994269	2.5835838	5.994269	up	8.438342	3.0769596	8.438342	Tjp1	tight junction protein 1
10565567					3.063483	1.6151729	3.063483	4632427E13Rik	RIKEN cDNA 4632427E13 gene
10565904	3.3994532	1.7653027	3.3994532	up				Mrpl48|Rab6	"mitochondrial ribosomal protein L48 | RAB6, member RAS oncogene family"
10566405	3.2886183	1.7174816	3.2886183	up				Mapksp1	MAPK scaffold protein 1
10566877	3.4593344	1.7904944	3.4593344	up				Sbf2	SET binding factor 2
10567043	3.4326746	1.7793331	3.4326746	up				Rras2	related RAS viral (r-ras) oncogene homolog 2
10567084					3.2152996	1.6849532	3.2152996		
10567219	3.1416879	1.6515398	3.1416879	up				Arl6ip1	ADP-ribosylation factor-like 6 interacting protein 1
10567995	56.313286	5.8154035	56.313286	up	23.639013	4.563098	23.639013	Nupr1	nuclear protein 1
10569014	4.344328	2.119133	4.344328	up	3.9786818	1.9922905	3.9786818	Ifitm2	interferon induced transmembrane protein 2
10569200	3.6468878	1.8666658	3.6468878	up				Polr2l	polymerase (RNA) II (DNA directed) polypeptide L
10569319	4.515257	2.174808	4.515257	up				Ctsd	cathepsin D
10569429					18.021315	4.1716323	18.021315	Cdkn1c	cyclin-dependent kinase inhibitor 1C (P57)
10569707					5.3524218	2.4201918	5.3524218	Myadm	myeloid-associated differentiation marker
10569733					3.1880963	1.6726952	3.1880963	Arhgef18	rho/rac guanine nucleotide exchange factor (GEF) 18
10570344	3.5912266	1.8444767	3.5912266	up				Lamp1	lysosomal-associated membrane protein 1
10570434	4.4876046	2.1659455	4.4876046	up				Ifitm1|Gm7676	interferon induced transmembrane protein 1 | interferon induced transmembrane protein 1 pseudogene
10570518	21.152975	4.4027886	21.152975	up	18.724611	4.226864	18.724611	Myom2	myomesin 2
10570855	19.972176	4.3199196	19.972176	up	23.449257	4.5514703	23.449257	Plat	"plasminogen activator, tissue"
10571114	4.065477	2.0234246	4.065477	up				Erlin2	ER lipid raft associated 2
10571530	4.0723696	2.0258684	4.0723696	up	5.077323	2.344068	5.077323	Fat1	FAT tumor suppressor homolog 1 (Drosophila)
10571752					3.199076	1.6776552	3.199076	Dctd	dCMP deaminase
10571922	4.533995	2.1807828	4.533995	up	5.4868383	2.455975	5.4868383	Nek1	NIMA (never in mitosis gene a)-related expressed kinase 1
10572097	8.819562	3.140707	8.819562	up	4.392388	2.1350055	4.392388	Sh2d4a	SH2 domain containing 4A
10573703	3.6292539	1.859673	3.6292539	up				Tmem188	transmembrane protein 188
10573803	6.0830746	2.6048007	6.0830746	up				Cyld	cylindromatosis (turban tumor syndrome)
10574789	9.900188	3.307456	9.900188	up	13.389299	3.7430086	13.389299	Fam65a	"family with sequence similarity 65, member A"
10575249	5.2504263	2.3924346	5.2504263	up				Txnl4b	thioredoxin-like 4B
10576029	3.7351272	1.9011574	3.7351272	up				Cox4i1	cytochrome c oxidase subunit IV isoform 1
10576051					19.017475	4.2492537	19.017475	Foxc2	forkhead box C2
10576556					3.849957	1.9448423	3.849957		
10576661	7.424726	2.8923378	7.424726	up	3.2831774	1.7150927	3.2831774	Itgb1	integrin beta 1 (fibronectin receptor beta)
10577412					3.6385756	1.8633738	3.6385756	6820431F20Rik|2610005L07Rik|A430108E01Rik	cadherin 11 pseudogene | RIKEN cDNA A430108E01 gene
10577882	3.5562873	1.8303719	3.5562873	up				Hgsnat	heparan-alpha-glucosaminide N-acetyltransferase
10578138	4.022541	2.0081072	4.022541	up				Dctn6	dynactin 6
10578149	3.072373	1.6193533	3.072373	up				Leprotl1	leptin receptor overlapping transcript-like 1
10578681					6.466485	2.6929817	6.466485		
10578810	3.9790514	1.9924245	3.9790514	up				Clcn3	chloride channel 3
10578986					4.0814757	2.029091	4.0814757	Psd3	pleckstrin and Sec7 domain containing 3
10578989					4.313626	2.108901	4.313626	Psd3	pleckstrin and Sec7 domain containing 3
10579736	3.1257477	1.6442013	3.1257477	up				9130011J15Rik	RIKEN cDNA 9130011J15 gene
10580155	3.4262204	1.776618	3.4262204	up				D8Ertd738e	"DNA segment, Chr 8, ERATO Doi 738, expressed"
10580219	5.0952654	2.3491573	5.0952654	up				Calr	calreticulin
10580473					3.0487103	1.6081991	3.0487103	Zfp423	zinc finger protein 423
10581308	8.213826	3.0380545	8.213826	up				Myl6|Gm8894	"myosin, light polypeptide 6, alkali, smooth muscle and non-muscle | predicted gene 8894"
10581625	5.325101	2.412809	5.325101	up				2400003C14Rik	RIKEN cDNA 2400003C14 gene
10581772	3.1193807	1.6412597	3.1193807	up				Glg1	golgi apparatus protein 1
10581824	4.0740805	2.0264745	4.0740805	up				Fa2h	fatty acid 2-hydroxylase
10582562	5.7695913	2.528469	5.7695913	up	9.959704	3.316103	9.959704		
10582862	9.258872	3.2108364	9.258872	up				Arhgef12|Sp140	Rho guanine nucleotide exchange factor (GEF) 12 | Sp140 nuclear body protein
10582882					3.8694842	1.9521413	3.8694842		
10582888					4.2954364	2.1028047	4.2954364		
10582896					4.810593	2.2662148	4.810593		
10582916					3.5434842	1.8251686	3.5434842		
10583145	3.5131476	1.8127642	3.5131476	up				Tmem123	transmembrane protein 123
10583326	5.319669	2.4113364	5.319669	up	5.7132864	2.5143209	5.7132864	Slc36a4	"solute carrier family 36 (proton/amino acid symporter), member 4"
10584124	4.752691	2.2487445	4.752691	up				Arhgap32	Rho GTPase activating protein 32
10584162	4.043784	2.015706	4.043784	up				Tmed2	transmembrane emp24 domain trafficking protein 2
10584435	3.0333421	1.6009083	3.0333421	up				Vwa5a	von Willebrand factor A domain containing 5A
10584576	3.7801855	1.918457	3.7801855	up	3.516463	1.8141251	3.516463	Snord14d|Snord14c|Hspa8	"small nucleolar RNA, C/D box 14D | small nucleolar RNA, C/D box 14C | heat shock protein 8"
10584578	3.8865213	1.9584794	3.8865213	up	3.5755324	1.8381581	3.5755324	Snord14d|Snord14c|Hspa8	"small nucleolar RNA, C/D box 14D | small nucleolar RNA, C/D box 14C | heat shock protein 8"
10584580					4.335641	2.1162453	4.335641	Snord14e	"small nucleolar RNA, C/D box 14E"
10584712	3.0173054	1.5932608	3.0173054	up				Hyou1	hypoxia up-regulated 1
10585214	11.731761	3.5523477	11.731761	up				Cryab|Hspb2	"crystallin, alpha B | heat shock protein 2"
10585842	3.2519722	1.7013149	3.2519722	up				Nptn	neuroplastin
10586017	11.860566	3.568101	11.860566	up	8.085645	3.0153627	8.085645	Uaca	uveal autoantigen with coiled-coil domains and ankyrin repeats
10586284	5.9069276	2.562408	5.9069276	up				Dpp8	dipeptidylpeptidase 8
10586591	4.1333055	2.047296	4.1333055	up				Car12	carbonic anyhydrase 12
10586700	3.6912856	1.8841233	3.6912856	up				Rora	RAR-related orphan receptor alpha
10586744	8.309015	3.0546775	8.309015	up	5.2867146	2.4023714	5.2867146	Anxa2	annexin A2
10586759					3.4039865	1.7672253	3.4039865	Bnip2	BCL2/adenovirus E1B interacting protein 2
10586781	22.714104	4.5055165	22.714104	up	9.846123	3.2995558	9.846123	Myo1e	myosin IE
10587012	5.1483903	2.3641214	5.1483903	up				Ccpg1	cell cycle progression 1
10587315	5.763012	2.526823	5.763012	up				Gsta4	"glutathione S-transferase, alpha 4"
10587446	11.729326	3.5520482	11.729326	up				Myo6	myosin VI
10587503	7.364765	2.8806396	7.364765	up	3.6670997	1.8746395	3.6670997	Sh3bgrl2	SH3 domain binding glutamic acid-rich protein like 2
10587799	16.780708	4.068732	16.780708	up				Plscr2	phospholipid scramblase 2
10587829	6.4212523	2.6828547	6.4212523	up	5.843652	2.5468702	5.843652	Plod2	"procollagen lysine, 2-oxoglutarate 5-dioxygenase 2"
10588263	14.38548	3.8465414	14.38548	up	7.4756045	2.9021902	7.4756045	Slco2a1	"solute carrier organic anion transporter family, member 2a1"
10588893	3.0218544	1.5954342	3.0218544	up				Rhoa	"ras homolog gene family, member A"
10588942					3.5447645	1.8256898	3.5447645	Lamb2	"laminin, beta 2"
10589368					3.08664	1.6260371	3.08664	Plxnb1	plexin B1
10589929	3.0970838	1.6309104	3.0970838	up				Cmtm6	CKLF-like MARVEL transmembrane domain containing 6
10590597	4.469742	2.1601915	4.469742	up				Sacm1l	"SAC1 (suppressor of actin mutations 1, homolog)-like (S. cerevisiae)"
10592023	8.108293	3.0193982	8.108293	up				Aplp2	amyloid beta (A4) precursor-like protein 2
10592237	6.095275	2.6076913	6.095275	up				Ei24	etoposide induced 2.4 mRNA
10592655	6.147173	2.619923	6.147173	up				Arhgef12	Rho guanine nucleotide exchange factor (GEF) 12
10592847	5.341959	2.417369	5.341959	up				Myl6|Gm8894	"myosin, light polypeptide 6, alkali, smooth muscle and non-muscle | predicted gene 8894"
10592850	4.711335	2.236136	4.711335	up				Trappc4	trafficking protein particle complex 4
10593205	3.5377219	1.8228207	3.5377219	up				Rexo2	"REX2, RNA exonuclease 2 homolog (S. cerevisiae)"
10594221	4.2628856	2.0918303	4.2628856	up	5.974642	2.5788522	5.974642	Lrrc49	leucine rich repeat containing 49
10594241					3.086094	1.625782	3.086094	Gm9869	predicted gene 9869
10594301	4.025099	2.0090241	4.025099	up	4.85937	2.2807693	4.85937	Coro2b	"coronin, actin binding protein, 2B"
10594661					4.625557	2.2096272	4.625557	Tpm1	"tropomyosin 1, alpha"
10594762	8.550248	3.0959663	8.550248	up	3.2229145	1.6883659	3.2229145	Fam81a	"family with sequence similarity 81, member A"
10594800	3.0208719	1.594965	3.0208719	up				Fam63b	"family with sequence similarity 63, member B"
10594840	5.376153	2.4265742	5.376153	up	6.4759192	2.695085	6.4759192	Gcom1	GRINL1A complex locus
10594855	8.981031	3.166881	8.981031	up				Cgnl1	cingulin-like 1
10595000	12.25588	3.6154022	12.25588	up	12.80457	3.678587	12.80457	Tmod3	tropomodulin 3
10595109	5.0581346	2.3386054	5.0581346	up	3.0653527	1.6160531	3.0653527	Lrrc1	leucine rich repeat containing 1
10595140	6.179986	2.6276035	6.179986	up				Rn7sk	"RNA, 7SK, nuclear"
10595288	4.67562	2.2251577	4.67562	up				Tmem30a	transmembrane protein 30A
10595793	3.4184732	1.7733521	3.4184732	up				Atp1b3	"ATPase, Na+/K+ transporting, beta 3 polypeptide"
10595805	3.707429	1.890419	3.707429	up				Rasa2	RAS p21 protein activator 2
10596053	3.094667	1.6297841	3.094667	up				Pccb	"propionyl Coenzyme A carboxylase, beta polypeptide"
10596135					3.5921216	1.8448362	3.5921216		
10596200	6.834565	2.7728496	6.834565	up	7.479057	2.9028563	7.479057	Tmem108	transmembrane protein 108
10596303	10.432054	3.3829513	10.432054	up	11.059228	3.4671788	11.059228	Acpp	"acid phosphatase, prostate"
10596893	5.090768	2.3478832	5.090768	up	4.1198277	2.042584	4.1198277	Dag1	dystroglycan 1
10597239	5.38289	2.428381	5.38289	up				Pth1r	parathyroid hormone 1 receptor
10597354	3.560573	1.8321095	3.560573	up				Pdcd6ip	programmed cell death 6 interacting protein
10597461	4.3155265	2.1095366	4.3155265	up	7.0159245	2.8106332	7.0159245	Cmtm7|Gm9888	CKLF-like MARVEL transmembrane domain containing 7 | predicted gene 9888
10597627	3.165716	1.6625319	3.165716	up				Oxsr1	oxidative-stress responsive 1
10598083					6.850095	2.776124	6.850095		
10598087					3.005481	1.5875959	3.005481		
10598107	5.8210998	2.5412917	5.8210998	up	3.2532494	1.7018814	3.2532494	Taf1a	"TATA box binding protein (Tbp)-associated factor, RNA polymerase I, A"
10598164	3.2874675	1.7169766	3.2874675	up				0610010K06Rik	RIKEN cDNA 0610010K06 gene
10598678	3.2045026	1.6801004	3.2045026	up				Usp9x	"ubiquitin specific peptidase 9, X chromosome"
10599120					3.934065	1.9760208	3.934065	Dock11	dedicator of cytokinesis 11
10599174	5.019885	2.3276544	5.019885	up				Il13ra1	"interleukin 13 receptor, alpha 1"
10599461	3.221085	1.6875467	3.221085	up	3.3351638	1.7377577	3.3351638	Calm2	calmodulin 2
10599581	4.0190687	2.0068612	4.0190687	up	7.028927	2.8133044	7.028927	2610018G03Rik	RIKEN cDNA 2610018G03 gene
10600377	5.242474	2.3902478	5.242474	up				Atp6ap1	"ATPase, H+ transporting, lysosomal accessory protein 1"
10600390	4.4876876	2.1659722	4.4876876	up				Gdi1	guanosine diphosphate (GDP) dissociation inhibitor 1
10600597					5.8924513	2.558868	5.8924513	Tmem47	transmembrane protein 47
10600911	5.9044743	2.5618086	5.9044743	up				Yipf6	"Yip1 domain family, member 6"
10600936	3.3810685	1.7574792	3.3810685	up	4.9251156	2.3001575	4.9251156	Efnb1	ephrin B1
10601088					5.171265	2.3705173	5.171265	Gm9078	predicted gene 9078
10601235	4.722134	2.239439	4.722134	up				Ogt	O-linked N-acetylglucosamine (GlcNAc) transferase (UDP-N-acetylglucosamine:polypeptide-N-acetylglucosaminyl transferase)
10601328	11.01135	3.4609194	11.01135	up	5.3821783	2.4281902	5.3821783	Uprt	uracil phosphoribosyltransferase (FUR1) homolog (S. cerevisiae)
10601616	5.6382756	2.495254	5.6382756	up				Diap2	diaphanous homolog 2 (Drosophila)
10602020	6.4729023	2.6944127	6.4729023	up				Tbc1d8b	"TBC1 domain family, member 8B"
10602925	3.6600707	1.8718715	3.6600707	up				Phka2	phosphorylase kinase alpha 2
10603567	4.3029346	2.105321	4.3029346	up				Dynlt3	dynein light chain Tctex-type 3
10604019	4.565374	2.190733	4.565374	up				1810037I17Rik	RIKEN cDNA 1810037I17 gene
10604057					3.4781353	1.7983141	3.4781353	6-Sep	septin 6
10604187	3.4721673	1.7958364	3.4721673	up				Lamp2	lysosomal-associated membrane protein 2
10604393					4.316953	2.1100135	4.316953	Elf4	E74-like factor 4 (ets domain transcription factor)
10604576					3.3857238	1.7594643	3.3857238	Gpc3	glypican 3
10604974	4.443117	2.1515722	4.443117	up				Cetn2	centrin 2
10605081	3.9444811	1.9798355	3.9444811	up				Bcap31	B-cell receptor-associated protein 31
10605303	4.4259114	2.1459746	4.4259114	up				Dnase1l1	deoxyribonuclease 1-like 1
10605437	7.5337925	2.9133763	7.5337925	up				Pls3	plastin 3 (T-isoform)
10606217	3.0831852	1.6244216	3.0831852	up				Abcb7	"ATP-binding cassette, sub-family B (MDR/TAP), member 7"
10606301	3.844916	1.9429522	3.844916	up				Magt1	magnesium transporter 1
10606315	4.5158644	2.175002	4.5158644	up				Taf9b	"TAF9B RNA polymerase II, TATA box binding protein (TBP)-associated factor"
10607089	7.179935	2.8439708	7.179935	up				Acsl4	acyl-CoA synthetase long-chain family member 4
10607497	3.4151824	1.7719626	3.4151824	up				Suclg2	"succinate-Coenzyme A ligase, GDP-forming, beta subunit"
10607619	4.370057	2.1276522	4.370057	up				Cdkl5	cyclin-dependent kinase-like 5
10607705	3.3365123	1.7383409	3.3365123	up				S100g	S100 calcium binding protein G
10607865					5.3864746	2.4293413	5.3864746	Tmsb4x	"thymosin, beta 4, X chromosome"
10607870	6.5844994	2.7190738	6.5844994	up	8.143573	3.025662	8.143573	Tlr7	toll-like receptor 7
10608138	5.7424603	2.521669	5.7424603	up				Ddx3y	"DEAD (Asp-Glu-Ala-Asp) box polypeptide 3, Y-linked"
10608280					3.5525677	1.8288622	3.5525677		
10608325					3.5287964	1.8191762	3.5287964		
10608499					3.5458543	1.8261333	3.5458543		
