# Supplementary material for: Defining the Molecular Character of the Developing and Adult Kidney Podocyte
Source: PLoS One. 2011 Sep 8;6(9):e24640. doi: 10.1371/journal.pone.0024640 (PMC3169617; doi:10.1371/journal.pone.0024640)
Supplement: Table S5 — List of podocyte expressed genes associated with signal transduction. (XLS) [file pone.0024640.s007.xls]

UniqueSortedTranscriptClusterID	genesymbol	genedescription
10344658	Rb1cc1	RB1-inducible coiled-coil 1
10357630	Srgap2	SLIT-ROBO Rho GTPase activating protein 2
10361897	Ifngr1	interferon gamma receptor 1
10361926	Map3k5	mitogen-activated protein kinase kinase kinase 5
10362294	Arhgap18	Rho GTPase activating protein 18
10368175	Pde7b	phosphodiesterase 7B
10372478	Rab21	"RAB21, member RAS oncogene family"
10372618	Frs2	fibroblast growth factor receptor substrate 2
10372891	Srgap1	SLIT-ROBO Rho GTPase activating protein 1
10373521	Rab5b	"RAB5B, member RAS oncogene family"
10373610	Olfr767	olfactory receptor 767
10374364	Akt2	thymoma viral proto-oncogene 2
10374455	Spred2	"sprouty-related, EVH1 domain containing 2"
10374466	Rab1	"RAB1, member RAS oncogene family"
10387625	Chrnb1	"cholinergic receptor, nicotinic, beta polypeptide 1 (muscle)"
10388579	Gosr1	golgi SNAP receptor complex member 1
10388884	Nlk	nemo like kinase
10390103	Pdk2	"pyruvate dehydrogenase kinase, isoenzyme 2"
10390117	Itga3	integrin alpha 3
10393836	Arhgdia	Rho GDP dissociation inhibitor (GDI) alpha
10395328	Snx13	sorting nexin 13
10395692	Arhgap5	Rho GTPase activating protein 5
10403842	Elmo1	"engulfment and cell motility 1, ced-12 homolog (C. elegans)"
10406205	Erap1	endoplasmic reticulum aminopeptidase 1
10407173	Il6st	interleukin 6 signal transducer
10410039	Ptch1	patched homolog 1
10411229	F2r	coagulation factor II (thrombin) receptor
10411235	Iqgap2	IQ motif containing GTPase activating protein 2
10412267	Itga2	integrin alpha 2
10413733	Sema3g	"sema domain, immunoglobulin domain (Ig), short basic domain, secreted, (semaphorin) 3G"
10418927	Bmpr1a	"bone morphogenetic protein receptor, type 1A"
10423520	Sema5a	"sema domain, seven thrombospondin repeats (type 1 and type 1-like), transmembrane domain (TM) and short cytoplasmic domain, (semaphorin) 5A"
10424711	Rhpn1	"rhophilin, Rho GTPase binding protein 1"
10427461	Ptger4	prostaglandin E receptor 4 (subtype EP4)
10427796	Npr3	natriuretic peptide receptor 3
10428857	Mtss1	metastasis suppressor 1
10432256	Arf3	ADP-ribosylation factor 3
10435305	Itgb5	integrin beta 5
10436209	Cblb	Casitas B-lineage lymphoma b
10440344	Robo2	roundabout homolog 2 (Drosophila)
10445237	3110082D06Rik	RIKEN cDNA 3110082D06 gene
10445241	Tnfrsf21	"tumor necrosis factor receptor superfamily, member 21"
10448094	Lnpep	leucyl/cystinyl aminopeptidase
10452613	Arhgap28	Rho GTPase activating protein 28
10453705	Rab18	"RAB18, member RAS oncogene family"
10453747	Colec12	collectin sub-family member 12
10456296	Malt1	mucosa associated lymphoid tissue lymphoma translocation gene 1
10456974	Arf1	ADP-ribosylation factor 1
10457250	Arhgap12	Rho GTPase activating protein 12
10462922	Plce1	"phospholipase C, epsilon 1"
10464425	Grk5	G protein-coupled receptor kinase 5
10465683	Rab11b	"RAB11B, member RAS oncogene family"
10466606	Anxa1	annexin A1
10467013	Prkg1	"protein kinase, cGMP-dependent, type I"
10471555	Angptl2	angiopoietin-like 2
10472893	B230120H23Rik	RIKEN cDNA B230120H23 gene
10473281	Itgav	integrin alpha V
10473965	Arhgap1	Rho GTPase activating protein 1
10475890	Mertk	c-mer proto-oncogene tyrosine kinase
10482500	Rnd3	Rho family GTPase 3
10483046	Dpp4	dipeptidylpeptidase 4
10486057	Rab5b	"RAB5B, member RAS oncogene family"
10492890	Lrba	LPS-responsive beige-like anchor
10495685	Arhgap29	Rho GTPase activating protein 29
10496397	Mapksp1	MAPK scaffold protein 1
10496519	Unc5c	unc-5 homolog C (C. elegans)
10499420	Robld3	roadblock domain containing 3
10499811	Npr1	natriuretic peptide receptor 1
10502105	Egf	epidermal growth factor
10506298	Leprot	leptin receptor overlapping transcript
10506883	Rab3b	"RAB3B, member RAS oncogene family"
10506939	Eps15	epidermal growth factor receptor pathway substrate 15
10508805	Wasf2	"WAS protein family, member 2"
10513061	Ctnnal1	"catenin (cadherin associated protein), alpha-like 1"
10513158	Ptpn3	"protein tyrosine phosphatase, non-receptor type 3"
10514668	Jak1	Janus kinase 1
10518147	Pdpn	podoplanin
10519747	Sema3e	"sema domain, immunoglobulin domain (Ig), short basic domain, secreted, (semaphorin) 3E"
10519913	Magi2	"membrane associated guanylate kinase, WW and PDZ domain containing 2"
10522324	Gabrb1	"gamma-aminobutyric acid (GABA) A receptor, subunit beta 1"
10523579	Arhgap24	Rho GTPase activating protein 24
10525439	P2rx4	"purinergic receptor P2X, ligand-gated ion channel 4"
10527538	Rasl11a	"RAS-like, family 11, member A"
10528268	Ptpn12	"protein tyrosine phosphatase, non-receptor type 12"
10530421	Gabra4	"gamma-aminobutyric acid (GABA) A receptor, subunit alpha 4"
10530733	Clock	circadian locomoter output cycles kaput
10541484	M6pr|M6pr-ps	"mannose-6-phosphate receptor, cation dependent | mannose-6-phosphate receptor, pseudogene"
10542414	Ptpro	"protein tyrosine phosphatase, receptor type, O"
10543306	Tspan12	tetraspanin 12
10546803	Itpr1|Gm10429	"inositol 1,4,5-triphosphate receptor 1 | predicted gene 10429"
10551393	Akt2	thymoma viral proto-oncogene 2
10551907	Nphs1	"nephrosis 1 homolog, nephrin (human)"
10552824	Rras	"Harvey rat sarcoma oncogene, subgroup R"
10555414	Rab6	"RAB6, member RAS oncogene family"
10556528	Pde3b	"phosphodiesterase 3B, cGMP-inhibited"
10565904	Mrpl48|Rab6	"mitochondrial ribosomal protein L48 | RAB6, member RAS oncogene family"
10566405	Mapksp1	MAPK scaffold protein 1
10567043	Rras2	related RAS viral (r-ras) oncogene homolog 2
10567995	Nupr1	nuclear protein 1
10569733	Arhgef18	rho/rac guanine nucleotide exchange factor (GEF) 18
10576661	Itgb1	integrin beta 1 (fibronectin receptor beta)
10578986	Psd3	pleckstrin and Sec7 domain containing 3
10578989	Psd3	pleckstrin and Sec7 domain containing 3
10583145	Tmem123	transmembrane protein 123
10584124	Arhgap32	Rho GTPase activating protein 32
10585214	Cryab|Hspb2	"crystallin, alpha B | heat shock protein 2"
10586017	Uaca	uveal autoantigen with coiled-coil domains and ankyrin repeats
10586700	Rora	RAR-related orphan receptor alpha
10588893	Rhoa	"ras homolog gene family, member A"
10589368	Plxnb1	plexin B1
10595805	Rasa2	RAS p21 protein activator 2
10597239	Pth1r	parathyroid hormone 1 receptor
10597354	Pdcd6ip	programmed cell death 6 interacting protein
10599174	Il13ra1	"interleukin 13 receptor, alpha 1"
10600390	Gdi1	guanosine diphosphate (GDP) dissociation inhibitor 1
10607870	Tlr7	toll-like receptor 7
