# Supplementary material for: Defining the Molecular Character of the Developing and Adult Kidney Podocyte
Source: PLoS One. 2011 Sep 8;6(9):e24640. doi: 10.1371/journal.pone.0024640 (PMC3169617; doi:10.1371/journal.pone.0024640)
Supplement: Table S7 — List of 365 genes with elevated podocyte expression. This list is derived using a more stringent five fold enrichment, compared to the three fold enrichment used to make the 894 list. (XLS) [file pone.0024640.s009.xls]

Transcripts Cluster Id	Fold change([PODADULT] vs [cortex-total]) ( UP - Fold change([PODADULT] vs [cortex-total]) )	Fold change([PODADULT] vs [pod13.5]) ( UP - Fold change([PODADULT] vs [pod13.5]) )	genesymbol	genedescription
10350806	19.878252	77.15423	Nphs2	"nephrosis 2 homolog, podocin (human)"
10567995	23.639013	56.313286	Nupr1	nuclear protein 1
10389025	11.010989	46.14085	Myo1d	myosin ID
10359118	51.01716	44.59912	Tdrd5	tudor domain containing 5
10474229	11.035495	41.55886	Cd59a|Cd59b	CD59a antigen | CD59b antigen
10475890	8.682702	34.855984	Mertk	c-mer proto-oncogene tyrosine kinase
10445347	9.105511	33.9388	Clic5	chloride intracellular channel 5
10542414	26.760542	33.633877	Ptpro	"protein tyrosine phosphatase, receptor type, O"
10483046	9.869693	32.822277	Dpp4	dipeptidylpeptidase 4
10459421	13.759433	30.169254	Atp8b1	"ATPase, class I, type 8B, member 1"
10367036	33.04206	30.132063	Rdh1	retinol dehydrogenase 1 (all trans)
10556297	18.628523	28.685379	Adm	adrenomedullin
10508405	34.909504	28.227964	Tmem54	transmembrane protein 54
10558150		28.206383	Htra1	HtrA serine peptidase 1
10543791	26.537691	27.613659	Podxl	podocalyxin-like
10530612	21.14397	26.13903	Fryl	furry homolog-like (Drosophila)
10555118	9.773237	25.870583	Pak1	p21 protein (Cdc42/Rac)-activated kinase 1
10502081	8.316997	25.585968	Enpep	glutamyl aminopeptidase
10470101	18.321692	25.129797	Clic3	chloride intracellular channel 3
10356269	5.516779	24.771593	Sp140|A530032D15Rik	Sp140 nuclear body protein | RIKEN cDNA A530032D15Rik gene
10519747	23.71994	24.704996	Sema3e	"sema domain, immunoglobulin domain (Ig), short basic domain, secreted, (semaphorin) 3E"
10518147	17.479622	24.062937	Pdpn	podoplanin
10586781	9.846123	22.714104	Myo1e	myosin IE
10360684	5.6793914	22.231415	Ephx1	"epoxide hydrolase 1, microsomal"
10529819	11.114337	21.713226	Fgfbp1	fibroblast growth factor binding protein 1
10438753		21.604815	Leprel1	leprecan-like 1
10350473	19.51903	21.455626	B3galt2	"UDP-Gal:betaGlcNAc beta 1,3-galactosyltransferase, polypeptide 2"
10570518	18.724611	21.152975	Myom2	myomesin 2
10401968		21.007385	Galc	galactosylceramidase
10501629	14.309856	20.262024	Cdc14a	CDC14 cell division cycle 14 homolog A (S. cerevisiae)
10389022	8.940825	20.003523	Myo1d	myosin ID
10570855	23.449257	19.972176	Plat	"plasminogen activator, tissue"
10536697	12.889873	19.625723	Asb15	ankyrin repeat and SOCS box-containing 15
10551907	22.874743	19.261686	Nphs1	"nephrosis 1 homolog, nephrin (human)"
10471555	13.119329	18.978706	Angptl2	angiopoietin-like 2
10462922	33.284893	18.732578	Plce1	"phospholipase C, epsilon 1"
10494821	25.460518	18.54983	Tspan2	tetraspanin 2
10415723	27.113798	18.34382		
10466606	10.613355	18.340826	Anxa1	annexin A1
10506883	14.007146	18.309687	Rab3b	"RAB3B, member RAS oncogene family"
10446334	20.417418	17.909515	Glcci1	glucocorticoid induced transcript 1
10383025	18.22755	17.73336	C1qtnf1	C1q and tumor necrosis factor related protein 1
10404422	8.133731	17.580717	Serpinb6b	"serine (or cysteine) peptidase inhibitor, clade B, member 6b"
10346838	19.83527	17.436	Pard3b	par-3 partitioning defective 3 homolog B (C. elegans)
10519913	16.2476	17.204964	Magi2	"membrane associated guanylate kinase, WW and PDZ domain containing 2"
10427796	34.198383	17.070183	Npr3	natriuretic peptide receptor 3
10429607	6.6570864	16.99308	Top1mt	"DNA topoisomerase 1, mitochondrial"
10587799		16.780708	Plscr2	phospholipid scramblase 2
10356267	6.9230947	16.281792	A530032D15Rik	
10545409		16.213135	Vamp8	vesicle-associated membrane protein 8
10543145	13.931353	15.915411	Thsd7a	"thrombospondin, type I, domain containing 7A"
10354003		15.739677	Mgat4a	"mannoside acetylglucosaminyltransferase 4, isoenzyme A"
10365482		15.682614	Timp3	tissue inhibitor of metalloproteinase 3
10556426	6.102134	15.293658	Parva	"parvin, alpha"
10530592	9.5581665	14.906819	Fryl	furry homolog-like (Drosophila)
10588263	7.4756045	14.38548	Slco2a1	"solute carrier organic anion transporter family, member 2a1"
10467258	6.5422845	14.164613	Myof	myoferlin
10502240	5.9593945	14.027634	Npnt	nephronectin
10404053		13.9173565	Hist1h2bc	"histone cluster 1, H2bc"
10471567	33.664272	13.770174	C130021I20Rik	Riken cDNA C130021I20 gene
10500327		13.762762	Hist2h3c2	"histone cluster 2, H3c2"
10411235		13.550739	Iqgap2	IQ motif containing GTPase activating protein 2
10349404	11.902849	13.484549	Mgat5	mannoside acetylglucosaminyltransferase 5
10376956	10.973793	13.003195	Hs3st3a1	heparan sulfate (glucosamine) 3-O-sulfotransferase 3A1
10436456	9.859113	12.8738	Pros1	protein S (alpha)
10403229		12.725939	Itgb8	integrin beta 8
10395466	11.944272	12.621135	Dock4	dedicator of cytokinesis 4
10392560	14.55486	12.548443	Abca9	"ATP-binding cassette, sub-family A (ABC1), member 9"
10500614		12.372949	Man1a2	"mannosidase, alpha, class 1A, member 2"
10423556		12.257023	Pgcp	plasma glutamate carboxypeptidase
10595000	12.80457	12.25588	Tmod3	tropomodulin 3
10452613	25.891197	12.079159	Arhgap28	Rho GTPase activating protein 28
10435769		12.020029	Zbtb20	zinc finger and BTB domain containing 20
10371321		11.874812	Slc41a2	"solute carrier family 41, member 2"
10586017	8.085645	11.860566	Uaca	uveal autoantigen with coiled-coil domains and ankyrin repeats
10444830		11.800306	H2-Q7|H2-Q6|H2-Q8	"histocompatibility 2, Q region locus 7 | histocompatibility 2, Q region locus 6 | histocompatibility 2, Q region locus 8"
10585214		11.731761	Cryab|Hspb2	"crystallin, alpha B | heat shock protein 2"
10587446		11.729326	Myo6	myosin VI
10440099	7.0867906	11.655409	St3gal6|Dcbld2	"ST3 beta-galactoside alpha-2,3-sialyltransferase 6 | discoidin, CUB and LCCL domain containing 2"
10404250		11.652123	Dcdc2a	doublecortin domain containing 2a
10561527		11.444027	Actn4|Capn12	actinin alpha 4 | calpain 12
10522248		11.271297	Gm6517	predicted gene 6517
10559261		11.065199	Cd81	CD81 antigen
10601328	5.3821783	11.01135	Uprt	uracil phosphoribosyltransferase (FUR1) homolog (S. cerevisiae)
10396778		10.952121	Mpp5	"membrane protein, palmitoylated 5 (MAGUK p55 subfamily member 5)"
10471247		10.825679	Aif1l	allograft inflammatory factor 1-like
10421046	6.0199647	10.768264	Dock5	dedicator of cytokinesis 5
10490903	12.069278	10.732998	Car13	carbonic anhydrase 13
10346810	10.224491	10.658569	Pard3b	par-3 partitioning defective 3 homolog B (C. elegans)
10439126	5.134225	10.630184		
10498273	6.006994	10.604518	Tm4sf1	transmembrane 4 superfamily member 1
10367041	6.8934417	10.53802	Rdh9	retinol dehydrogenase 9
10523281	10.664887	10.439321	11-Sep	septin 11
10596303	11.059228	10.432054	Acpp	"acid phosphatase, prostate"
10446656		10.206498	Lpin2	lipin 2
10446986		10.172007	Crim1	cysteine rich transmembrane BMP regulator 1 (chordin like)
10485643	23.468393	10.118609	AI314831	
10543118	9.583967	10.063278	Glcci1	glucocorticoid induced transcript 1
10372891	25.021175	10.035408	Srgap1	SLIT-ROBO Rho GTPase activating protein 1
10574789	13.389299	9.900188	Fam65a	"family with sequence similarity 65, member A"
10360789		9.874972	Degs1	degenerative spermatocyte homolog 1 (Drosophila)
10453759	11.685843	9.857083	Gm10554	predicted gene 10554
10515051		9.776341	Osbpl9|Nrd1	"oxysterol binding protein-like 9 | nardilysin, N-arginine dibasic convertase, NRD convertase 1"
10361897	5.271106	9.707998	Ifngr1	interferon gamma receptor 1
10498584	9.993144	9.7045555	Rarres1	retinoic acid receptor responder (tazarotene induced) 1
10545958		9.6462965	Anxa4	annexin A4
10357488	6.59527	9.597525	Cd55	CD55 antigen
10369102	7.824471	9.584876	Gm9766	predicted gene 9766
10435305	6.7878704	9.522916	Itgb5	integrin beta 5
10479833	7.347005	9.421341	Optn	optineurin
10480275	9.89708	9.41579	Nebl	nebulette
10451198	6.1970344	9.398344	Vegfa	vascular endothelial growth factor A
10440491		9.328261	App	amyloid beta (A4) precursor protein
10463224	11.263916	9.32802	Marveld1	MARVEL (membrane-associating) domain containing 1
10453747	11.6076	9.327851	Colec12	collectin sub-family member 12
10506360	12.893068	9.327274	Sgip1	SH3-domain GRB2-like (endophilin) interacting protein 1
10530841		9.306273	Igfbp7	insulin-like growth factor binding protein 7
10428857	5.022514	9.27604	Mtss1	metastasis suppressor 1
10582862		9.258872	Arhgef12|Sp140	Rho guanine nucleotide exchange factor (GEF) 12 | Sp140 nuclear body protein
10474223	5.4815636	9.229071	Cd59b	CD59b antigen
10344707		9.194623	Pcmtd1	protein-L-isoaspartate (D-aspartate) O-methyltransferase domain containing 1
10544570		9.125446	Pcnp	PEST proteolytic signal containing nuclear protein
10367717		9.100678	BC013529	
10492355		9.036022	Mme	membrane metallo endopeptidase
10435789		9.034595	Zbtb20	zinc finger and BTB domain containing 20
10594855		8.981031	Cgnl1	cingulin-like 1
10572097		8.819562	Sh2d4a	SH2 domain containing 4A
10549420	9.447468	8.616642	Tmtc1	transmembrane and tetratricopeptide repeat containing 1
10594762		8.550248	Fam81a	"family with sequence similarity 81, member A"
10485828		8.48633	Slc12a6|Gm10792	"solute carrier family 12, member 6 | predicted gene 10792"
10451679	10.366185	8.466253	Daam2	dishevelled associated activator of morphogenesis 2
10353181		8.402787	Lactb2	"lactamase, beta 2"
10426437		8.399591	Rn7sk	"RNA, 7SK, nuclear"
10347807	7.0035524	8.356711	Col4a3	"collagen, type IV, alpha 3"
10513061	5.97697	8.34545	Ctnnal1	"catenin (cadherin associated protein), alpha-like 1"
10496494		8.344647	Tspan5	tetraspanin 5
10473281		8.316598	Itgav	integrin alpha V
10484894		8.309899	Ptprj	"protein tyrosine phosphatase, receptor type, J"
10586744	5.2867146	8.309015	Anxa2	annexin A2
10581308		8.213826	Myl6|Gm8894	"myosin, light polypeptide 6, alkali, smooth muscle and non-muscle | predicted gene 8894"
10392642	5.5300164	8.187484	Abca5	"ATP-binding cassette, sub-family A (ABC1), member 5"
10390117	10.006076	8.167339	Itga3	integrin alpha 3
10592023		8.108293	Aplp2	amyloid beta (A4) precursor-like protein 2
10380381		7.9177694	Tob1	transducer of ErbB-2.1
10418991		7.822633	Gcap14	granule cell antiserum positive 14
10385926	5.6952	7.718691	Cdc42se2	CDC42 small effector 2
10463355	8.676804	7.6763535	Scd2	stearoyl-Coenzyme A desaturase 2
10493114	12.102653	7.65814	Nes	nestin
10420011		7.6560473	Myl6|Gm8894	"myosin, light polypeptide 6, alkali, smooth muscle and non-muscle | predicted gene 8894"
10539894		7.6508794	Mgll	monoglyceride lipase
10484888		7.561173	Ptprj	"protein tyrosine phosphatase, receptor type, J"
10502105		7.5452557	Egf	epidermal growth factor
10605437		7.5337925	Pls3	plastin 3 (T-isoform)
10511739		7.52089	Cpne3	copine III
10523579		7.4903946	Arhgap24	Rho GTPase activating protein 24
10462195		7.4606657	Kank1	KN motif and ankyrin repeat domains 1
10361790		7.458543	Fuca2	"fucosidase, alpha-L- 2, plasma"
10404059		7.456672	Hist1h1c	"histone cluster 1, H1c"
10373396		7.433345	Myl6	"myosin, light polypeptide 6, alkali, smooth muscle and non-muscle"
10576661		7.424726	Itgb1	integrin beta 1 (fibronectin receptor beta)
10587503		7.364765	Sh3bgrl2	SH3 domain binding glutamic acid-rich protein like 2
10451004		7.3609033	Cd2ap	CD2-associated protein
10469457		7.3451257	Plxdc2	plexin domain containing 2
10375002		7.312345	Cpeb4	cytoplasmic polyadenylation element binding protein 4
10404700		7.229198	Ubxn2a	UBX domain protein 2A
10607089		7.179935	Acsl4	acyl-CoA synthetase long-chain family member 4
10503399		7.1733384	Myl6|Gm8894	"myosin, light polypeptide 6, alkali, smooth muscle and non-muscle | predicted gene 8894"
10425114		7.1350913	Tmed2	transmembrane emp24 domain trafficking protein 2
10357164		7.068838	Epb4.1l5	erythrocyte protein band 4.1-like 5
10440344	15.381154	6.9746284	Robo2	roundabout homolog 2 (Drosophila)
10547521		6.9539833	Atp6v1e1	"ATPase, H+ transporting, lysosomal V1 subunit E1"
10514779		6.9227104	Prkaa2	"protein kinase, AMP-activated, alpha 2 catalytic subunit"
10367673	7.105605	6.8831463	Plekhg1	"pleckstrin homology domain containing, family G (with RhoGef domain) member 1"
10500685		6.882036	Atp1a1	"ATPase, Na+/K+ transporting, alpha 1 polypeptide"
10596200	7.479057	6.834565	Tmem108	transmembrane protein 108
10456974		6.829787	Arf1	ADP-ribosylation factor 1
10456296		6.820344	Malt1	mucosa associated lymphoid tissue lymphoma translocation gene 1
10395328		6.764656	Snx13	sorting nexin 13
10487476		6.7637863	1500011K16Rik	RIKEN cDNA 1500011K16 gene
10383756		6.7415366	Ifitm2	interferon induced transmembrane protein 2
10354372		6.7383156	Myl6	"myosin, light polypeptide 6, alkali, smooth muscle and non-muscle"
10516910		6.7113876	Phactr4	phosphatase and actin regulator 4
10422598		6.6520233	Sepp1	"selenoprotein P, plasma, 1"
10458731	6.6455274	6.6423216	Mcc	mutated in colorectal cancers
10607870	8.143573	6.5844994	Tlr7	toll-like receptor 7
10448094		6.58029	Lnpep	leucyl/cystinyl aminopeptidase
10388884		6.5211473	Nlk	nemo like kinase
10351380		6.5062556	Ildr2	immunoglobulin-like domain containing receptor 2
10561842		6.502519	Capns1	"calpain, small subunit 1"
10602020		6.4729023	Tbc1d8b	"TBC1 domain family, member 8B"
10462111	5.5916443	6.4688983	Gm9938	predicted gene 9938
10445185	7.5751786	6.462481	Rn18s	18S ribosomal RNA
10386058	8.644823	6.4261055	Sparc	secreted acidic cysteine rich glycoprotein
10587829	5.843652	6.4212523	Plod2	"procollagen lysine, 2-oxoglutarate 5-dioxygenase 2"
10447708	5.9517336	6.4030895	Qk	quaking
10345241		6.3788166	Dst	dystonin
10499811	7.240595	6.3541255	Npr1	natriuretic peptide receptor 1
10419223		6.3494754	Fermt2	fermitin family homolog 2 (Drosophila)
10447190	16.725359	6.3074374	Plekhh2	"pleckstrin homology domain containing, family H (with MyTH4 domain) member 2"
10471464	8.027687	6.216445	St6galnac6	"ST6 (alpha-N-acetyl-neuraminyl-2,3-beta-galactosyl-1,3)-N-acetylgalactosaminide alpha-2,6-sialyltransferase 6"
10428561		6.1896915	Rad21	RAD21 homolog (S. pombe)
10498775	12.781365	6.1822333	Golim4	golgi integral membrane protein 4
10595140		6.179986	Rn7sk	"RNA, 7SK, nuclear"
10445338		6.159276	Enpp5	ectonucleotide pyrophosphatase/phosphodiesterase 5
10552276		6.154555	Ube2h|Gm2058	ubiquitin-conjugating enzyme E2H | predicted gene 2058
10362596	7.9434524	6.1541033	Fyn	
10525439		6.1486545	P2rx4	"purinergic receptor P2X, ligand-gated ion channel 4"
10592655		6.147173	Arhgef12	Rho guanine nucleotide exchange factor (GEF) 12
10455372		6.1436715	C330007P06Rik	RIKEN cDNA C330007P06 gene
10467013	7.0553236	6.1424813	Prkg1	"protein kinase, cGMP-dependent, type I"
10347933		6.126071	Sp140|Arhgef12|C130026I21Rik|A530032D15Rik|LOC100040994|LOC100041057	Sp140 nuclear body protein | Rho guanine nucleotide exchange factor (GEF) 12 | RIKEN cDNA C130026I21 gene | RIKEN cDNA A530032D15Rik gene | similar to RIKEN cDNA C130026I21 gene | similar to C130026I21Rik protein
10344897	16.611198	6.114023	Sulf1	sulfatase 1
10530563	5.3450885	6.113506	Fryl	furry homolog-like (Drosophila)
10346722		6.1120453	Nbeal1	neurobeachin like 1
10592237		6.095275	Ei24	etoposide induced 2.4 mRNA
10573803		6.0830746	Cyld	cylindromatosis (turban tumor syndrome)
10533945		6.0209875	Ubc	ubiquitin C
10564343	8.438342	5.994269	Tjp1	tight junction protein 1
10423520	5.9996147	5.991997	Sema5a	"sema domain, seven thrombospondin repeats (type 1 and type 1-like), transmembrane domain (TM) and short cytoplasmic domain, (semaphorin) 5A"
10531653	7.9793997	5.980911	Tmem150c	transmembrane protein 150C
10522324	6.6523137	5.96274	Gabrb1	"gamma-aminobutyric acid (GABA) A receptor, subunit beta 1"
10384795		5.937567	Cyb5d1|Gm6685	cytochrome b5 domain containing 1 | cytochrome b5 domain containing 1 pseudogene
10419038		5.928682	Ghitm	growth hormone inducible transmembrane protein
10476021		5.9092064	Sirpa	signal-regulatory protein alpha
10586284		5.9069276	Dpp8	dipeptidylpeptidase 8
10600911		5.9044743	Yipf6	"Yip1 domain family, member 6"
10486396		5.901189	Ehd4	EH-domain containing 4
10447354		5.89817	Tmx2	thioredoxin-related transmembrane protein 2
10466441		5.8972754	Vps13a	vacuolar protein sorting 13A (yeast)
10388033		5.8921843	Derl2	"Der1-like domain family, member 2"
10393559	6.023354	5.8909597	Timp2	tissue inhibitor of metalloproteinase 2
10544891	5.1620846	5.8772955	Nod1	nucleotide-binding oligomerization domain containing 1
10394429		5.876996	1110057K04Rik	RIKEN cDNA 1110057K04 gene
10465244		5.840273	Malat1	metastasis associated lung adenocarcinoma transcript 1 (non-coding RNA)
10598107		5.8210998	Taf1a	"TATA box binding protein (Tbp)-associated factor, RNA polymerase I, A"
10497149		5.81377	Wls	wntless homolog (Drosophila)
10521616		5.803767	C1qtnf7	C1q and tumor necrosis factor related protein 7
10416419	10.308767	5.802319	Gm10847	predicted gene 10847
10362294		5.799484	Arhgap18	Rho GTPase activating protein 18
10423941		5.7723074	Ttc35	tetratricopeptide repeat domain 35
10582562	9.959704	5.7695913		
10587315		5.763012	Gsta4	"glutathione S-transferase, alpha 4"
10346551		5.7573557	Cflar	CASP8 and FADD-like apoptosis regulator
10608138		5.7424603	Ddx3y	"DEAD (Asp-Glu-Ala-Asp) box polypeptide 3, Y-linked"
10443027		5.7252254	A930001N09Rik	RIKEN cDNA A930001N09 gene
10465853		5.7236476	Stxbp3a|Stxbp3b	syntaxin binding protein 3A | syntaxin-binding protein 3B
10556528		5.7221704	Pde3b	"phosphodiesterase 3B, cGMP-inhibited"
10357630		5.6779876	Srgap2	SLIT-ROBO Rho GTPase activating protein 2
10601616		5.6382756	Diap2	diaphanous homolog 2 (Drosophila)
10545298		5.621369	Rmnd5a	required for meiotic nuclear division 5 homolog A (S. cerevisiae)
10553299		5.6152096	Ifitm2	interferon induced transmembrane protein 2
10491414	8.217601	5.614918	Usp13	ubiquitin specific peptidase 13 (isopeptidase T-3)
10355567		5.6056724	Tmbim1	transmembrane BAX inhibitor motif containing 1
10498064	6.1776924	5.579602	Setd7	SET domain containing (lysine methyltransferase) 7
10494761	5.5126305	5.564548	Vtcn1	V-set domain containing T cell activation inhibitor 1
10472501		5.558177	Lass6	"LAG1 homolog, ceramide synthase 6"
10491279		5.5558276	Prkci	"protein kinase C, iota"
10507784		5.554695	Ppt1	palmitoyl-protein thioesterase 1
10408850		5.405527	Nedd9	"neural precursor cell expressed, developmentally down-regulated gene 9"
10459084	7.4272566	5.3993955	Synpo	synaptopodin
10356968		5.3874645	Pam	peptidylglycine alpha-amidating monooxygenase
10597239		5.38289	Pth1r	parathyroid hormone 1 receptor
10594840	6.4759192	5.376153	Gcom1	GRINL1A complex locus
10429160	9.83934	5.3515778	St3gal1	"ST3 beta-galactoside alpha-2,3-sialyltransferase 1"
10592847		5.341959	Myl6|Gm8894	"myosin, light polypeptide 6, alkali, smooth muscle and non-muscle | predicted gene 8894"
10509023		5.3356557	Syf2	"SYF2 homolog, RNA splicing factor (S. cerevisiae)"
10581625		5.325101	2400003C14Rik	RIKEN cDNA 2400003C14 gene
10583326	5.7132864	5.319669	Slc36a4	"solute carrier family 36 (proton/amino acid symporter), member 4"
10377431	5.213057	5.2671037	Vamp2	vesicle-associated membrane protein 2
10506254	12.233771	5.264223	Raver2	"ribonucleoprotein, PTB-binding 2"
10387363		5.2527018	Cyb5d1|Gm6685	cytochrome b5 domain containing 1 | cytochrome b5 domain containing 1 pseudogene
10575249		5.2504263	Txnl4b	thioredoxin-like 4B
10467110		5.248969	AI747699	
10600377		5.242474	Atp6ap1	"ATPase, H+ transporting, lysosomal accessory protein 1"
10457250		5.238594	Arhgap12	Rho GTPase activating protein 12
10480286	7.090429	5.2372456	Nebl	nebulette
10535866		5.235162	Ubl3	ubiquitin-like 3
10543686		5.221971	Ube2h|Gm2058	ubiquitin-conjugating enzyme E2H | predicted gene 2058
10543306		5.203584	Tspan12	tetraspanin 12
10427290	7.6655803	5.2019143	Hoxc8	homeobox C8
10455238		5.1824055	Ndfip1	Nedd4 family interacting protein 1
10527538	9.242505	5.179599	Rasl11a	"RAS-like, family 11, member A"
10426751		5.16943	Tmbim6	transmembrane BAX inhibitor motif containing 6
10387625	6.06874	5.1671133	Chrnb1	"cholinergic receptor, nicotinic, beta polypeptide 1 (muscle)"
10421970	8.148808	5.166529		
10415844		5.1658854	Ctsb|Fdft1	cathepsin B | farnesyl diphosphate farnesyl transferase 1
10369531	5.5265155	5.1627874	Tspan15	tetraspanin 15
10413733	6.3025026	5.151483	Sema3g	"sema domain, immunoglobulin domain (Ig), short basic domain, secreted, (semaphorin) 3G"
10447602		5.1505876	Ezr	ezrin
10381187		5.1494946	Atp6v0a1	"ATPase, H+ transporting, lysosomal V0 subunit A1"
10545130	7.260699	5.149156	Gadd45a	growth arrest and DNA-damage-inducible 45 alpha
10587012		5.1483903	Ccpg1	cell cycle progression 1
10421557		5.1403375	Itm2b	integral membrane protein 2B
10363379		5.117189	Cbara1	calcium binding atopy-related autoantigen 1
10580219		5.0952654	Calr	calreticulin
10558948		5.0952067	Cd151	CD151 antigen
10596893		5.090768	Dag1	dystroglycan 1
10489484		5.0789075	Sdc4	syndecan 4
10480288	6.984904	5.069735	Nebl	nebulette
10488415		5.064292	Cst3	cystatin C
10595109		5.0581346	Lrrc1	leucine rich repeat containing 1
10390635		5.0480337	1810046J19Rik	RIKEN cDNA 1810046J19 gene
10599174		5.019885	Il13ra1	"interleukin 13 receptor, alpha 1"
10501860	5.6794667	5.017979	Fnbp1l	formin binding protein 1-like
10352661	5.6703696		Ptpn14	"protein tyrosine phosphatase, non-receptor type 14"
10354368	5.061936			
10358717	5.0085144		1700025G04Rik	RIKEN cDNA 1700025G04 gene
10361771	8.664469		Plagl1	pleiomorphic adenoma gene-like 1
10368240	14.586838		Tcf21	transcription factor 21
10369929	5.445547			
10384572	5.4304996		1110067D22Rik	RIKEN cDNA 1110067D22 gene
10397633	16.914944		Flrt2	fibronectin leucine rich transmembrane protein 2
10402705	6.2022204		Gm266	predicted gene 266
10403842	5.245982		Elmo1	"engulfment and cell motility 1, ced-12 homolog (C. elegans)"
10404774	6.325362		Hivep1	human immunodeficiency virus type I enhancer binding protein 1
10406845	18.648058		Foxd1	forkhead box D1
10412267	5.6359916		Itga2	integrin alpha 2
10420988	7.661082		Dpysl2	dihydropyrimidinase-like 2
10421581	5.226664		Lrch1	leucine-rich repeats and calponin homology (CH) domain containing 1
10421950	10.350861		Dach1	dachshund 1 (Drosophila)
10427293	6.382539		Hoxc6	homeobox C6
10431915	6.8990283		Slc38a4	"solute carrier family 38, member 4"
10434229	5.3747673		Cldn5	claudin 5
10434758	5.9499907		St6gal1	"beta galactoside alpha 2,6 sialyltransferase 1"
10436209	9.309165		Cblb	Casitas B-lineage lymphoma b
10439881	5.3873453		5330426P16Rik	RIKEN cDNA 5330426P16 gene
10450920	13.1487875		AY036118	
10454828	7.429417		Pnet-ps	"prenatal ethanol induced mRNA, pseudogene"
10455721	7.299986		Sncaip	"synuclein, alpha interacting protein (synphilin)"
10463799	5.0965877			
10468309	5.916019		Sh3pxd2a	SH3 and PX domains 2A
10469243	6.2655716		Mir297b	microRNA 297b
10469322	8.299351		Vim	vimentin
10471533	5.5979238			
10472097	6.065291		Fmnl2	formin-like 2
10474045	5.9660063		Chst1	carbohydrate (keratan sulfate Gal-6) sulfotransferase 1
10474295	19.176609		Wt1	Wilms tumor 1 homolog
10478744	6.2055855			
10485357	5.840176			
10489246	8.5434265		Mafb	"v-maf musculoaponeurotic fibrosarcoma oncogene family, protein B (avian)"
10502890	10.195315		St6galnac3	"ST6 (alpha-N-acetyl-neuraminyl-2,3-beta-galactosyl-1,3)-N-acetylgalactosaminide alpha-2,6-sialyltransferase 3"
10508436	5.1354556		Sync|Rbbp4	syncoilin | retinoblastoma binding protein 4
10511631	5.4259224		Slc26a7	"solute carrier family 26, member 7"
10519140	5.045895		Mmp23	matrix metallopeptidase 23
10522060	5.6303573		Fam114a1	"family with sequence similarity 114, member A1"
10530421	6.9274597		Gabra4	"gamma-aminobutyric acid (GABA) A receptor, subunit alpha 4"
10536170	5.131531		Rn18s	18S ribosomal RNA
10538377	5.7105546		Wipf3	"WAS/WASL interacting protein family, member 3"
10544638	5.3486037		Tra2a	transformer 2 alpha homolog (Drosophila)
10545283	6.3154726		Smyd1	SET and MYND domain containing 1
10545479	5.595567		Tmsb10	"thymosin, beta 10"
10551009	5.826414		Tmsb10	"thymosin, beta 10"
10569429	18.021315		Cdkn1c	cyclin-dependent kinase inhibitor 1C (P57)
10569707	5.3524218		Myadm	myeloid-associated differentiation marker
10571530	5.077323		Fat1	FAT tumor suppressor homolog 1 (Drosophila)
10571922	5.4868383		Nek1	NIMA (never in mitosis gene a)-related expressed kinase 1
10576051	19.017475		Foxc2	forkhead box C2
10578681	6.466485			
10594221	5.974642		Lrrc49	leucine rich repeat containing 49
10597461	7.0159245		Cmtm7|Gm9888	CKLF-like MARVEL transmembrane domain containing 7 | predicted gene 9888
10598083	6.850095			
10599581	7.028927		2610018G03Rik	RIKEN cDNA 2610018G03 gene
10600597	5.8924513		Tmem47	transmembrane protein 47
10601088	5.171265		Gm9078	predicted gene 9078
10607865	5.3864746		Tmsb4x	"thymosin, beta 4, X chromosome"
