# Supplementary material for: Defining the Molecular Character of the Developing and Adult Kidney Podocyte
Source: PLoS One. 2011 Sep 8;6(9):e24640. doi: 10.1371/journal.pone.0024640 (PMC3169617; doi:10.1371/journal.pone.0024640)
Supplement: Table S8 — List of 144 highly enriched, highly expressed podocyte genes. (XLS) [file pone.0024640.s010.xls]

Transcripts Cluster Id	Fold change([adultpod] vs [cortex])	genesymbol	genedescription	~pod-raw signal	in situ
10392560	13.814544	Abca9	"ATP-binding cassette, sub-family A (ABC1), member 9"	1200	
10596303	6.3030252	Acpp	"acid phosphatase, prostate"	700	
10556297	10.533775	Adm	adrenomedullin	1300	
10374083	5.263134	Aebp1	AE binding protein 1	450	
10471555	11.786511	Angptl2	angiopoietin-like 2	2700	yes
10466606	6.062974	Anxa1	annexin A1	1800	
10452613	18.48501	Arhgap28	Rho GTPase activating protein 28	2300	
10536697	9.721519	Asb15	ankyrin repeat and SOCS box-containing 15	1650	
10459421	9.133397	Atp8b1	"ATPase, class I, type 8B, member 1"	1800	
10350473	11.803626	B3galt2	"UDP-Gal:betaGlcNAc beta 1,3-galactosyltransferase, polypeptide 2"	1400	
10383025	13.89286	C1qtnf1	C1q and tumor necrosis factor related protein 1	1700	
10490903	9.338697	Car13	carbonic anhydrase 13	1250	
10436209	6.2724614	Cblb	Casitas B-lineage lymphoma b	2000	
10474229	5.2720013	Cd59a|Cd59b	CD59a antigen | CD59b antigen	3500	
10501629	10.621822	Cdc14a	CDC14 cell division cycle 14 homolog A (S. cerevisiae)	3000	yes
10569429	11.166357	Cdkn1c	cyclin-dependent kinase inhibitor 1C (P57)	5200	yes
10387625	5.265779	Chrnb1	"cholinergic receptor, nicotinic, beta polypeptide 1 (muscle)"	700	
10474045	6.3500147	Chst1	carbohydrate (keratan sulfate Gal-6) sulfotransferase 1	1300	
10434229	5.5220127	Cldn5	claudin 5	1000	
10470101	13.12214	Clic3	chloride intracellular channel 3	2000	
10445347	6.005954	Clic5	chloride intracellular channel 5	4100	yes
10597461	6.5108743	Cmtm7|Gm9888	CKLF-like MARVEL transmembrane domain containing 7 | predicted gene 9888	1200	
10453747	8.19767	Colec12	collectin sub-family member 12	1700	
10594301	5.4827213	Coro2b	"coronin, actin binding protein, 2B"	400	
10451679	8.976484	Daam2	dishevelled associated activator of morphogenesis 2	1000	
10421950	8.408266	Dach1	dachshund 1 (Drosophila)	1600	
10432278	6.1710253	Ddn	dendrin	400	
10395466	10.158436	Dock4	dedicator of cytokinesis 4	1500	
10421046	5.0134864	Dock5	dedicator of cytokinesis 5	2000	
10483046	6.410645	Dpp4	dipeptidylpeptidase 4	7200	yes
10420988	8.99478	Dpysl2	dihydropyrimidinase-like 2	800	
10600936	5.9278684	Efnb1	ephrin B1	800	yes
10604393	5.0528812	Elf4	E74-like factor 4 (ets domain transcription factor)	400	
10502081	5.5721545	Enpep	glutamyl aminopeptidase	6700	yes
10574789	10.435792	Fam65a	"family with sequence similarity 65, member A"	2000	
10571530	5.5317254	Fat1	FAT tumor suppressor homolog 1 (Drosophila)	1250	
10529819	5.311236	Fgfbp1	fibroblast growth factor binding protein 1	1200	
10397633	11.832276	Flrt2	fibronectin leucine rich transmembrane protein 2	1650	
10576051	9.958618	Foxc2	forkhead box C2	3900	yes
10406845	11.05754	Foxd1	forkhead box D1	2700	
10530563	5.6470804	Fryl	furry homolog-like (Drosophila)	1100	
10362596	8.448916	Fyn		1300	
10530421	5.249038	Gabra4	"gamma-aminobutyric acid (GABA) A receptor, subunit alpha 4"	400	
10522324	7.4999666	Gabrb1	"gamma-aminobutyric acid (GABA) A receptor, subunit beta 1"	300	
10376269	5.373513	Galnt10	UDP-N-acetyl-alpha-D-galactosamine:polypeptide N-acetylgalactosaminyltransferase 10	600	
10594840	5.2378254	Gcom1	GRINL1A complex locus	600	
10446334	12.846546	Glcci1	glucocorticoid induced transcript 1	2600	
10498775	9.631931	Golim4	golgi integral membrane protein 4	3900	
10427293	5.924811	Hoxc6	homeobox C6	950	
10427290	7.2134786	Hoxc8	homeobox C8	700	
10376956	7.037386	Hs3st3a1	heparan sulfate (glucosamine) 3-O-sulfotransferase 3A1	2800	
10533050	5.6860685	Hspb8	heat shock protein 8	700	
10390117	11.654165	Itga3	integrin alpha 3	1100	yes
10435305	6.985462	Itgb5	integrin beta 5	2700	
10514466	5.615746	Jun		1000	yes
10499168	5.467401	Kirrel	kin of IRRE like (Drosophila)	350	
10421581	5.729301	Lrch1	leucine-rich repeats and calponin homology (CH) domain containing 1	700	
10489246	7.5819945	Mafb	"v-maf musculoaponeurotic fibrosarcoma oncogene family, protein B (avian)"	1400	yes
10519913	12.428933	Magi2	"membrane associated guanylate kinase, WW and PDZ domain containing 2"	1500	yes
10463224	6.7480597	Marveld1	MARVEL (membrane-associating) domain containing 1	3100	
10458731	6.4073615	Mcc	mutated in colorectal cancers	950	
10475890	6.6165276	Mertk	c-mer proto-oncogene tyrosine kinase	3900	
10349404	9.755342	Mgat5	mannoside acetylglucosaminyltransferase 5	2100	yes
10519140	5.9772034	Mmp23	matrix metallopeptidase 23	900	
10428857	5.135481	Mtss1	metastasis suppressor 1	1300	yes
10389022	7.9619727	Myo1d	myosin ID	3200	
10586781	7.4631915	Myo1e	myosin IE	2700	
10467258	5.4441934	Myof	myoferlin	1450	
10570518	16.064663	Myom2	myomesin 2	2000	
10480275	9.271581	Nebl	nebulette	1000	
10431812	5.4157815	Nell2	NEL-like 2 (chicken)	200	
10493114	13.047723	Nes	nestin	1100	yes
10551907	20.851147	Nphs1	"nephrosis 1 homolog, nephrin (human)"	2700	yes
10350806	13.330474	Nphs2	"nephrosis 2 homolog, podocin (human)"	8800	yes
10499811	7.239293	Npr1	natriuretic peptide receptor 1	750	
10427796	19.301388	Npr3	natriuretic peptide receptor 3	5000	
10567995	12.162551	Nupr1	nuclear protein 1	9000	
10479833	7.3568463	Optn	optineurin	1300	yes
10555118	5.7363234	Pak1	p21 protein (Cdc42/Rac)-activated kinase 1	3400	
10346810	9.158833	Pard3b	par-3 partitioning defective 3 homolog B (C. elegans)	1250	yes
10518147	10.910254	Pdpn	podoplanin	4000	
10361771	6.8265777	Plagl1	pleiomorphic adenoma gene-like 1	1450	
10570855	19.886913	Plat	"plasminogen activator, tissue"	4000	yes
10462922	21.688574	Plce1	"phospholipase C, epsilon 1"	3000	
10367673	6.3553185	Plekhg1	"pleckstrin homology domain containing, family G (with RhoGef domain) member 1"	900	
10447190	13.28845	Plekhh2	"pleckstrin homology domain containing, family H (with MyTH4 domain) member 2"	2100	yes
10454828	8.092363	Pnet-ps	"prenatal ethanol induced mRNA, pseudogene"	750	
10543791	19.812082	Podxl	podocalyxin-like	4300	yes
10467013	8.267169	Prkg1	"protein kinase, cGMP-dependent, type I"	650	
10436456	6.2094264	Pros1	protein S (alpha)	1600	
10352661	5.5779347	Ptpn14	"protein tyrosine phosphatase, non-receptor type 14"	1250	
10542414	27.11233	Ptpro	"protein tyrosine phosphatase, receptor type, O"	5000	yes
10506883	17.209696	Rab3b	"RAB3B, member RAS oncogene family"	1100	
10498584	14.280647	Rarres1	retinoic acid receptor responder (tazarotene induced) 1	1100	
10527538	5.5123916	Rasl11a	"RAS-like, family 11, member A"	1200	
10506254	11.433671	Raver2	"ribonucleoprotein, PTB-binding 2"	1100
10367036	25.22769	Rdh1	retinol dehydrogenase 1 (all trans)	3600
10367041	8.65434	Rdh9	retinol dehydrogenase 9	2100
10445185	6.726749	Rn18s	18S ribosomal RNA	11500
10362674	6.7056913	Rnu3a	U3A small nuclear RNA	300
10380061	5.337358	Rnu3b1|Rnu3b2|Rnu3b4|Rnu3b3	U3B small nuclear RNA 1 | U3B small nuclear RNA 2 | U3B small nuclear RNA 4 | U3B small nuclear RNA 3	700
10440344	10.338661	Robo2	roundabout homolog 2 (Drosophila)	2800
10463355	7.045296	Scd2	stearoyl-Coenzyme A desaturase 2	1200
10519747	15.799137	Sema3e	"sema domain, immunoglobulin domain (Ig), short basic domain, secreted, (semaphorin) 3E"	1800
10413733	7.64573	Sema3g	"sema domain, immunoglobulin domain (Ig), short basic domain, secreted, (semaphorin) 3G"	1000
10423520	5.574258	Sema5a	"sema domain, seven thrombospondin repeats (type 1 and type 1-like), transmembrane domain (TM) and short cytoplasmic domain, (semaphorin) 5A"	1500
10523281	7.980104	septin11	septin11	4000
10498064	6.1305637	Setd7	SET domain containing (lysine methyltransferase) 7	1050
10506360	11.044478	Sgip1	SH3-domain GRB2-like (endophilin) interacting protein 1	1200
10522288	5.293383	Shisa3	shisa homolog 3 (Xenopus laevis)	1200
10431915	7.5058985	Slc38a4	"solute carrier family 38, member 4"	700
10588263	6.0244913	Slco2a1	"solute carrier organic anion transporter family, member 2a1"	1700	
10455721	7.6672654	Sncaip	"synuclein, alpha interacting protein (synphilin)"	600	
10584576	5.1949043	Snord14d|Snord14c|Hspa8	"small nucleolar RNA, C/D box 14D | small nucleolar RNA, C/D box 14C | heat shock protein 8"	1500	
10386058	5.7806277	Sparc	secreted acidic cysteine rich glycoprotein	9300	
10372891	20.420473	Srgap1	SLIT-ROBO Rho GTPase activating protein 1	2300	yes
10429160	11.876489	St3gal1	"ST3 beta-galactoside alpha-2,3-sialyltransferase 1"	1000	
10434758	5.518769	St6gal1	"beta galactoside alpha 2,6 sialyltransferase 1"	700	
10502890	8.340892	St6galnac3	"ST6 (alpha-N-acetyl-neuraminyl-2,3-beta-galactosyl-1,3)-N-acetylgalactosaminide alpha-2,6-sialyltransferase 3"	850	
10471464	7.964223	St6galnac6	"ST6 (alpha-N-acetyl-neuraminyl-2,3-beta-galactosyl-1,3)-N-acetylgalactosaminide alpha-2,6-sialyltransferase 6"	850	
10344897	13.560404	Sulf1	sulfatase 1	1500	yes
10459084	8.103893	Synpo	synaptopodin	700	yes
10368240	8.794819	Tcf21	transcription factor 21	3500	
10359118	32.189434	Tdrd5	tudor domain containing 5	3200	yes
10427095	5.048534	Tenc1	tensin like C1 domain-containing phosphatase	600	
10543145	11.005116	Thsd7a	"thrombospondin, type I, domain containing 7A"	2200	
10393559	5.8592167	Timp2	tissue inhibitor of metalloproteinase 2	1300	
10564343	6.292412	Tjp1	tight junction protein 1	4500	
10607870	5.276307	Tlr7	toll-like receptor 7	350	
10596200	6.49125	Tmem108	transmembrane protein 108	800	
10531653	9.457794	Tmem150c	transmembrane protein 150C	1200	
10600597	5.4732265	Tmem47	transmembrane protein 47	1350	
10508405	17.930477	Tmem54	transmembrane protein 54	1700	
10595000	7.584388	Tmod3	tropomodulin 3	6200	
10549420	8.769015	Tmtc1	transmembrane and tetratricopeptide repeat containing 1	1300	
10429607	6.0146904	Top1mt	"DNA topoisomerase 1, mitochondrial"	1800	yes
10544638	5.3964267	Tra2a	transformer 2 alpha homolog (Drosophila)	600	
10369531	5.6501107	Tspan15	tetraspanin 15	800	
10494821	16.218086	Tspan2	tetraspanin 2	2600	
10491414	8.784311	Usp13	ubiquitin specific peptidase 13 (isopeptidase T-3)	500	
10451198	5.900229	Vegfa	vascular endothelial growth factor A	2000	
10469322	6.070644	Vim	vimentin	3200	
10494761	5.4487643	Vtcn1	V-set domain containing T cell activation inhibitor 1	650	
10474295	16.698421	Wt1	Wilms tumor 1 homolog	2500
